# Supplementary material
Source: Elsevier journal article supplement (http://library.osu.edu/projects/msa/suppmat/v254.i2.pp119-125/mmc1.pdf)
Supplement: mmc1 [file mmc1.pdf]

**Table A1**  
**Transition frequencies of the  $\tilde{A} - \tilde{X}$  system for HSO (in  $\text{cm}^{-1}$ )**

|                                   | $N'$ | $K_a'$ | $K_c'$ | $J'$ | $N''$ | $K_a''$ | $K_c''$ | $J''$ | Obs.      | Obs.-Calc. | Weight. |
|-----------------------------------|------|--------|--------|------|-------|---------|---------|-------|-----------|------------|---------|
| $\tilde{A}(000) - \tilde{X}(000)$ |      |        |        |      |       |         |         |       |           |            |         |
| $K_a' - K_a'' = 0-1$              |      |        |        |      |       |         |         |       |           |            |         |
| P                                 | 0    | 0      | 0      | 0.5  | 1     | 1       | 0       | 1.5   | 14372.681 | 0.003      | 1.0     |
|                                   | 0    | 0      | 0      | 0.5  | 1     | 1       | 0       | 0.5   | 14372.408 | 0.008      | 1.0     |
|                                   | 1    | 0      | 1      | 1.5  | 2     | 1       | 1       | 2.5   | 14371.081 | 0.004      | 1.0     |
|                                   | 1    | 0      | 1      | 0.5  | 2     | 1       | 1       | 1.5   | 14370.905 | 0.003      | 0.1     |
|                                   | 2    | 0      | 2      | 2.5  | 3     | 1       | 2       | 3.5   | 14369.260 | 0.000      | 0.1     |
|                                   | 3    | 0      | 3      | 3.5  | 4     | 1       | 3       | 4.5   | 14367.213 | -0.005     | 0.1     |
| Q                                 | 1    | 0      | 1      | 1.5  | 1     | 1       | 1       | 1.5   | 14373.838 | 0.005      | 1.0     |
|                                   | 1    | 0      | 1      | 0.5  | 1     | 1       | 1       | 0.5   | 14373.571 | -0.002     | 1.0     |
|                                   | 2    | 0      | 2      | 2.5  | 2     | 1       | 2       | 2.5   | 14373.440 | 0.006      | 1.0     |
|                                   | 2    | 0      | 2      | 1.5  | 2     | 1       | 2       | 1.5   | 14373.290 | 0.009      | 1.0     |
|                                   | 3    | 0      | 3      | 3.5  | 3     | 1       | 3       | 3.5   | 14372.879 | 0.015      | 0.1     |
|                                   | 3    | 0      | 3      | 2.5  | 3     | 1       | 3       | 2.5   | 14372.756 | -0.003     | 0.1     |
|                                   | 4    | 0      | 4      | 3.5  | 4     | 1       | 4       | 3.5   | 14372.048 | 0.012      | 0.1     |
| R                                 | 2    | 0      | 2      | 2.5  | 1     | 1       | 0       | 1.5   | 14376.020 | 0.002      | 0.1     |
|                                   | 2    | 0      | 2      | 1.5  | 1     | 1       | 0       | 0.5   | 14375.753 | 0.000      | 0.1     |
|                                   | 3    | 0      | 3      | 3.5  | 2     | 1       | 1       | 2.5   | 14376.647 | 0.001      | 1.0     |
|                                   | 3    | 0      | 3      | 2.5  | 2     | 1       | 1       | 1.5   | 14376.491 | 0.011      | 0.1     |
|                                   | 4    | 0      | 4      | 4.5  | 3     | 1       | 2       | 3.5   | 14377.059 | 0.001      | 1.0     |
|                                   | 4    | 0      | 4      | 3.5  | 3     | 1       | 2       | 2.5   | 14376.929 | -0.002     | 1.0     |
|                                   | 5    | 0      | 5      | 5.5  | 4     | 1       | 3       | 4.5   | 14377.252 | 0.009      | 0.1     |
| $K_a' - K_a'' = 1-0$              |      |        |        |      |       |         |         |       |           |            |         |
| P                                 | 1    | 1      | 0      | 1.5  | 2     | 0       | 2       | 2.5   | 14389.541 | -0.009     | 1.0     |
|                                   | 1    | 1      | 0      | 0.5  | 2     | 0       | 2       | 1.5   | 14389.183 | -0.006     | 1.0     |
|                                   | 2    | 1      | 1      | 2.5  | 3     | 0       | 3       | 3.5   | 14387.818 | 0.001      | 1.0     |
|                                   | 2    | 1      | 1      | 1.5  | 3     | 0       | 3       | 2.5   | 14387.624 | -0.006     | 1.0     |
|                                   | 3    | 1      | 2      | 3.5  | 4     | 0       | 4       | 4.5   | 14385.914 | 0.001      | 1.0     |
|                                   | 3    | 1      | 2      | 2.5  | 4     | 0       | 4       | 3.5   | 14385.772 | 0.000      | 1.0     |
|                                   | 4    | 1      | 3      | 4.5  | 5     | 0       | 5       | 5.5   | 14383.828 | 0.001      | 1.0     |
|                                   | 4    | 1      | 3      | 3.5  | 5     | 0       | 5       | 4.5   | 14383.711 | 0.004      | 1.0     |
| Q                                 | 1    | 1      | 1      | 1.5  | 1     | 0       | 1       | 1.5   | 14392.148 | -0.005     | 1.0     |
|                                   | 1    | 1      | 1      | 0.5  | 1     | 0       | 1       | 0.5   | 14391.817 | 0.007      | 1.0     |



**Table A1**

**Continued**

| $N'$ | $K_a'$ | $K_c'$ | $J'$ | $N''$ | $K_a''$ | $K_c''$ | $J''$ | Obs.      | Obs.-Calc. | Weight. |
|------|--------|--------|------|-------|---------|---------|-------|-----------|------------|---------|
| 3    | 2      | 1      | 3.5  | 2     | 1       | 1       | 2.5   | 14412.922 | -0.004     | 1.0     |
| 3    | 2      | 1      | 2.5  | 2     | 1       | 1       | 1.5   | 14412.292 | 0.009      | 1.0     |
| 4    | 2      | 3      | 4.5  | 3     | 1       | 3       | 3.5   | 14413.563 | 0.008      | 0.1     |
| 4    | 2      | 3      | 3.5  | 3     | 1       | 3       | 2.5   | 14413.103 | 0.007      | 0.1     |
| 4    | 2      | 2      | 4.5  | 3     | 1       | 2       | 3.5   | 14413.298 | 0.005      | 0.1     |
| 4    | 2      | 2      | 3.5  | 3     | 1       | 2       | 2.5   | 14412.807 | -0.002     | 0.1     |
| 5    | 2      | 4      | 5.5  | 4     | 1       | 4       | 4.5   | 14413.897 | 0.007      | 0.1     |

$\tilde{A}(001) - \tilde{X}(000)$

$$K_a' - K_a'' = 0-1$$

|   |   |   |   |     |   |   |   |     |           |        |     |
|---|---|---|---|-----|---|---|---|-----|-----------|--------|-----|
| P | 0 | 0 | 0 | 0.5 | 1 | 1 | 0 | 0.5 | 15079.802 | -0.002 | 1.0 |
|   | 1 | 0 | 1 | 1.5 | 2 | 1 | 1 | 2.5 | 15078.478 | 0.006  | 1.0 |
|   | 1 | 0 | 1 | 0.5 | 2 | 1 | 1 | 1.5 | 15078.297 | -0.001 | 1.0 |
|   | 2 | 0 | 2 | 2.5 | 3 | 1 | 2 | 3.5 | 15076.647 | 0.006  | 1.0 |
|   | 2 | 0 | 2 | 1.5 | 3 | 1 | 2 | 2.5 | 15076.499 | -0.005 | 1.0 |
|   | 3 | 0 | 3 | 3.5 | 4 | 1 | 3 | 4.5 | 15074.583 | 0.006  | 1.0 |
|   | 3 | 0 | 3 | 2.5 | 4 | 1 | 3 | 3.5 | 15074.466 | 0.007  | 1.0 |
|   | 4 | 0 | 4 | 4.5 | 5 | 1 | 4 | 5.5 | 15072.287 | 0.008  | 0.1 |
|   | 4 | 0 | 4 | 3.5 | 5 | 1 | 4 | 4.5 | 15072.163 | -0.007 | 0.1 |
| Q | 1 | 0 | 1 | 1.5 | 1 | 1 | 1 | 1.5 | 15081.234 | 0.005  | 1.0 |
|   | 1 | 0 | 1 | 0.5 | 1 | 1 | 1 | 0.5 | 15080.972 | 0.004  | 1.0 |
|   | 2 | 0 | 2 | 2.5 | 2 | 1 | 2 | 2.5 | 15080.825 | 0.010  | 1.0 |
|   | 2 | 0 | 2 | 1.5 | 2 | 1 | 2 | 1.5 | 15080.668 | 0.005  | 1.0 |
|   | 3 | 0 | 3 | 3.5 | 3 | 1 | 3 | 3.5 | 15080.221 | -0.002 | 1.0 |
|   | 3 | 0 | 3 | 2.5 | 3 | 1 | 3 | 2.5 | 15080.099 | -0.017 | 1.0 |
|   | 4 | 0 | 4 | 4.5 | 4 | 1 | 4 | 4.5 | 15079.453 | 0.008  | 1.0 |
|   | 4 | 0 | 4 | 3.5 | 4 | 1 | 4 | 3.5 | 15079.368 | 0.005  | 1.0 |
|   | 5 | 0 | 5 | 4.5 | 5 | 1 | 5 | 4.5 | 15078.422 | 0.010  | 0.1 |
|   | 6 | 0 | 6 | 6.5 | 6 | 1 | 6 | 6.5 | 15077.316 | -0.003 | 0.1 |
|   | 6 | 0 | 6 | 5.5 | 6 | 1 | 6 | 5.5 | 15077.277 | 0.012  | 0.1 |
| R | 2 | 0 | 2 | 2.5 | 1 | 1 | 0 | 1.5 | 15083.401 | 0.002  | 1.0 |
|   | 2 | 0 | 2 | 1.5 | 1 | 1 | 0 | 0.5 | 15083.141 | 0.009  | 1.0 |
|   | 3 | 0 | 3 | 3.5 | 2 | 1 | 1 | 2.5 | 15084.015 | 0.010  | 1.0 |
|   | 3 | 0 | 3 | 2.5 | 2 | 1 | 1 | 1.5 | 15083.849 | 0.010  | 1.0 |

**Table A1**

**Continued**

|   | $N'$                   | $K_a'$ | $K_c'$ | $J'$ | $N''$ | $K_a''$ | $K_c''$ | $J''$ | Obs.      | Obs.-Calc. | Weight. |
|---|------------------------|--------|--------|------|-------|---------|---------|-------|-----------|------------|---------|
|   | 4                      | 0      | 4      | 4.5  | 3     | 1       | 2       | 3.5   | 15084.392 | 0.005      | 1.0     |
|   | 4                      | 0      | 4      | 3.5  | 3     | 1       | 2       | 2.5   | 15084.263 | 0.004      | 1.0     |
|   | 5                      | 0      | 5      | 5.5  | 4     | 1       | 3       | 4.5   | 15084.530 | -0.006     | 1.0     |
|   | 5                      | 0      | 5      | 4.5  | 4     | 1       | 3       | 3.5   | 15084.429 | 0.002      | 1.0     |
|   | $K_a' - K_a'' = 1 - 0$ |        |        |      |       |         |         |       |           |            |         |
| P | 1                      | 1      | 0      | 1.5  | 2     | 0       | 2       | 2.5   | 15097.004 | -0.001     | 1.0     |
|   | 1                      | 1      | 0      | 0.5  | 2     | 0       | 2       | 1.5   | 15096.613 | -0.007     | 1.0     |
|   | 2                      | 1      | 1      | 2.5  | 3     | 0       | 3       | 3.5   | 15095.248 | -0.007     | 1.0     |
|   | 2                      | 1      | 1      | 1.5  | 3     | 0       | 3       | 2.5   | 15095.053 | -0.004     | 1.0     |
|   | 3                      | 1      | 2      | 3.5  | 4     | 0       | 4       | 4.5   | 15093.324 | -0.005     | 1.0     |
|   | 3                      | 1      | 2      | 2.5  | 4     | 0       | 4       | 3.5   | 15093.169 | -0.010     | 1.0     |
|   | 4                      | 1      | 3      | 4.5  | 5     | 0       | 5       | 5.5   | 15091.211 | -0.003     | 1.0     |
|   | 4                      | 1      | 3      | 3.5  | 5     | 0       | 5       | 4.5   | 15091.079 | -0.006     | 1.0     |
|   | 5                      | 1      | 4      | 5.5  | 6     | 0       | 6       | 6.5   | 15088.906 | -0.002     | 1.0     |
|   | 5                      | 1      | 4      | 4.5  | 6     | 0       | 6       | 5.5   | 15088.796 | 0.006      | 1.0     |
| Q | 1                      | 1      | 1      | 1.5  | 1     | 0       | 1       | 1.5   | 15099.601 | -0.005     | 1.0     |
|   | 1                      | 1      | 1      | 0.5  | 1     | 0       | 1       | 0.5   | 15099.244 | 0.004      | 1.0     |
|   | 2                      | 1      | 2      | 2.5  | 2     | 0       | 2       | 2.5   | 15099.098 | -0.005     | 1.0     |
|   | 2                      | 1      | 2      | 1.5  | 2     | 0       | 2       | 1.5   | 15098.932 | -0.001     | 1.0     |
|   | 3                      | 1      | 3      | 3.5  | 3     | 0       | 3       | 3.5   | 15098.394 | 0.007      | 1.0     |
|   | 3                      | 1      | 3      | 2.5  | 3     | 0       | 3       | 2.5   | 15098.277 | 0.005      | 1.0     |
|   | 4                      | 1      | 4      | 4.5  | 4     | 0       | 4       | 4.5   | 15097.437 | -0.009     | 1.0     |
|   | 4                      | 1      | 4      | 3.5  | 4     | 0       | 4       | 3.5   | 15097.362 | 0.000      | 1.0     |
|   | 5                      | 1      | 5      | 5.5  | 5     | 0       | 5       | 5.5   | 15096.268 | -0.010     | 1.0     |
|   | 5                      | 1      | 5      | 4.5  | 5     | 0       | 5       | 4.5   | 15096.203 | -0.010     | 1.0     |
| R | 1                      | 1      | 0      | 1.5  | 0     | 0       | 0       | 0.5   | 15100.955 | -0.009     | 1.0     |
|   | 1                      | 1      | 0      | 0.5  | 0     | 0       | 0       | 0.5   | 15100.590 | -0.007     | 1.0     |
|   | 2                      | 1      | 1      | 2.5  | 1     | 0       | 1       | 1.5   | 15101.844 | -0.014     | 1.0     |
|   | 2                      | 1      | 1      | 1.5  | 1     | 0       | 1       | 0.5   | 15101.676 | 0.002      | 1.0     |
|   | 3                      | 1      | 2      | 3.5  | 2     | 0       | 2       | 2.5   | 15102.572 | -0.002     | 1.0     |
|   | 3                      | 1      | 2      | 2.5  | 2     | 0       | 2       | 1.5   | 15102.438 | 0.000      | 1.0     |
|   | 4                      | 1      | 3      | 4.5  | 3     | 0       | 3       | 3.5   | 15103.103 | 0.002      | 1.0     |
|   | 4                      | 1      | 3      | 3.5  | 3     | 0       | 3       | 2.5   | 15102.985 | -0.001     | 1.0     |
|   | 5                      | 1      | 4      | 5.5  | 4     | 0       | 4       | 4.5   | 15103.429 | -0.006     | 1.0     |

**Table A1**

**Continued**

|                      | $N'$ | $K_a'$ | $K_c'$ | $J'$ | $N''$ | $K_a''$ | $K_c''$ | $J''$ | Obs.      | Obs.-Calc. | Weight. |
|----------------------|------|--------|--------|------|-------|---------|---------|-------|-----------|------------|---------|
|                      | 5    | 1      | 4      | 4.5  | 4     | 0       | 4       | 3.5   | 15103.327 | -0.002     | 1.0     |
|                      | 6    | 1      | 5      | 6.5  | 5     | 0       | 5       | 5.5   | 15103.572 | -0.002     | 0.1     |
|                      | 6    | 1      | 5      | 5.5  | 5     | 0       | 5       | 4.5   | 15103.463 | -0.010     | 0.1     |
| $K_a' - K_a'' = 2-1$ |      |        |        |      |       |         |         |       |           |            |         |
| P                    | 2    | 2      | 1      | 2.5  | 3     | 1       | 3       | 3.5   | 15113.489 | 0.003      | 1.0     |
|                      | 2    | 2      | 1      | 1.5  | 3     | 1       | 3       | 2.5   | 15112.562 | 0.005      | 1.0     |
|                      | 2    | 2      | 0      | 2.5  | 3     | 1       | 2       | 3.5   | 15113.223 | 0.001      | 1.0     |
|                      | 2    | 2      | 0      | 1.5  | 3     | 1       | 2       | 2.5   | 15112.269 | 0.000      | 1.0     |
| Q                    | 2    | 2      | 0      | 2.5  | 2     | 1       | 2       | 2.5   | 15117.396 | -0.001     | 1.0     |
|                      | 2    | 2      | 0      | 1.5  | 2     | 1       | 2       | 1.5   | 15116.423 | -0.004     | 0.1     |
|                      | 2    | 2      | 1      | 2.5  | 2     | 1       | 1       | 2.5   | 15117.263 | -0.004     | 1.0     |
|                      | 2    | 2      | 1      | 1.5  | 2     | 1       | 1       | 1.5   | 15116.279 | -0.001     | 1.0     |
|                      | 3    | 2      | 1      | 3.5  | 3     | 1       | 3       | 3.5   | 15116.724 | 0.003      | 1.0     |
|                      | 3    | 2      | 1      | 2.5  | 3     | 1       | 3       | 2.5   | 15116.107 | -0.004     | 1.0     |
|                      | 3    | 2      | 2      | 3.5  | 3     | 1       | 2       | 3.5   | 15116.448 | -0.010     | 1.0     |
|                      | 3    | 2      | 2      | 2.5  | 3     | 1       | 2       | 2.5   | 15115.821 | -0.001     | 1.0     |
|                      | 4    | 2      | 2      | 4.5  | 4     | 1       | 4       | 4.5   | 15115.900 | 0.004      | 1.0     |
|                      | 4    | 2      | 3      | 4.5  | 4     | 1       | 3       | 4.5   | 15115.458 | 0.005      | 1.0     |
|                      | 4    | 2      | 3      | 3.5  | 4     | 1       | 3       | 3.5   | 15114.963 | 0.000      | 1.0     |
| R                    | 2    | 2      | 1      | 2.5  | 1     | 1       | 1       | 1.5   | 15120.025 | 0.002      | 1.0     |
|                      | 2    | 2      | 1      | 1.5  | 1     | 1       | 1       | 0.5   | 15118.949 | -0.001     | 1.0     |
|                      | 2    | 2      | 0      | 2.5  | 1     | 1       | 0       | 1.5   | 15119.976 | -0.005     | 1.0     |
|                      | 2    | 2      | 0      | 1.5  | 1     | 1       | 0       | 0.5   | 15118.898 | 0.001      | 1.0     |
|                      | 3    | 2      | 2      | 3.5  | 2     | 1       | 2       | 2.5   | 15120.633 | 0.001      | 1.0     |
|                      | 3    | 2      | 1      | 3.5  | 2     | 1       | 1       | 2.5   | 15120.504 | 0.002      | 1.0     |
|                      | 3    | 2      | 1      | 2.5  | 2     | 1       | 1       | 1.5   | 15119.836 | 0.003      | 1.0     |
|                      | 4    | 2      | 3      | 4.5  | 3     | 1       | 3       | 3.5   | 15121.107 | 0.008      | 1.0     |
|                      | 4    | 2      | 2      | 4.5  | 3     | 1       | 2       | 3.5   | 15120.845 | 0.007      | 1.0     |
|                      | 4    | 2      | 2      | 3.5  | 3     | 1       | 2       | 2.5   | 15120.336 | 0.002      | 1.0     |
|                      | 5    | 2      | 4      | 5.5  | 4     | 1       | 4       | 4.5   | 15121.399 | 0.003      | 1.0     |
|                      | 5    | 2      | 4      | 4.5  | 4     | 1       | 4       | 3.5   | 15121.025 | 0.009      | 0.1     |
|                      | 5    | 2      | 3      | 5.5  | 4     | 1       | 3       | 4.5   | 15120.961 | 0.004      | 0.1     |

$\tilde{A}(002) - \tilde{X}(000)$

**Table A1**

**Continued**

|                      | $N'$ | $K_a'$ | $K_c'$ | $J'$ | $N''$ | $K_a''$ | $K_c''$ | $J''$ | Obs.      | Obs.-Calc. | Weight. |
|----------------------|------|--------|--------|------|-------|---------|---------|-------|-----------|------------|---------|
| $K_a' - K_a'' = 0-1$ |      |        |        |      |       |         |         |       |           |            |         |
| P                    | 0    | 0      | 0      | 0.5  | 1     | 1       | 0       | 0.5   | 15779.697 | 0.007      | 1.0     |
|                      | 1    | 0      | 1      | 1.5  | 2     | 1       | 1       | 2.5   | 15778.355 | 0.004      | 1.0     |
|                      | 1    | 0      | 1      | 0.5  | 2     | 1       | 1       | 1.5   | 15778.180 | 0.004      | 0.1     |
|                      | 2    | 0      | 2      | 2.5  | 3     | 1       | 2       | 3.5   | 15776.505 | 0.001      | 1.0     |
|                      | 2    | 0      | 2      | 1.5  | 3     | 1       | 2       | 2.5   | 15776.369 | 0.001      | 0.1     |
|                      | 3    | 0      | 3      | 3.5  | 4     | 1       | 3       | 4.5   | 15774.436 | 0.020      | 1.0     |
|                      | 3    | 0      | 3      | 2.5  | 4     | 1       | 3       | 3.5   | 15774.293 | -0.007     | 1.0     |
|                      | 4    | 0      | 4      | 4.5  | 5     | 1       | 4       | 5.5   | 15772.089 | 0.002      | 1.0     |
|                      | 4    | 0      | 4      | 3.5  | 5     | 1       | 4       | 4.5   | 15771.982 | 0.001      | 1.0     |
| Q                    | 1    | 0      | 1      | 1.5  | 1     | 1       | 1       | 1.5   | 15781.109 | 0.001      | 1.0     |
|                      | 1    | 0      | 1      | 0.5  | 1     | 1       | 1       | 0.5   | 15780.846 | -0.002     | 1.0     |
|                      | 2    | 0      | 2      | 2.5  | 2     | 1       | 2       | 2.5   | 15780.676 | -0.003     | 1.0     |
|                      | 2    | 0      | 2      | 1.5  | 2     | 1       | 2       | 1.5   | 15780.518 | -0.008     | 1.0     |
|                      | 3    | 0      | 3      | 3.5  | 3     | 1       | 3       | 3.5   | 15780.052 | -0.011     | 1.0     |
|                      | 3    | 0      | 3      | 2.5  | 3     | 1       | 3       | 2.5   | 15779.963 | 0.006      | 1.0     |
|                      | 4    | 0      | 4      | 4.5  | 4     | 1       | 4       | 4.5   | 15779.253 | -0.001     | 1.0     |
|                      | 4    | 0      | 4      | 3.5  | 4     | 1       | 4       | 3.5   | 15779.177 | 0.003      | 0.1     |
|                      | 5    | 0      | 5      | 5.5  | 5     | 1       | 5       | 5.5   | 15778.254 | 0.007      | 0.1     |
|                      | 5    | 0      | 5      | 4.5  | 5     | 1       | 5       | 4.5   | 15778.180 | -0.004     | 0.1     |
| R                    | 2    | 0      | 2      | 2.5  | 1     | 1       | 0       | 1.5   | 15783.260 | -0.002     | 1.0     |
|                      | 2    | 0      | 2      | 1.5  | 1     | 1       | 0       | 0.5   | 15782.994 | -0.002     | 1.0     |
|                      | 3    | 0      | 3      | 3.5  | 2     | 1       | 1       | 2.5   | 15783.847 | 0.003      | 1.0     |
|                      | 3    | 0      | 3      | 2.5  | 2     | 1       | 1       | 1.5   | 15783.681 | 0.002      | 1.0     |
|                      | 4    | 0      | 4      | 4.5  | 3     | 1       | 2       | 3.5   | 15784.197 | 0.002      | 1.0     |
|                      | 4    | 0      | 4      | 3.5  | 3     | 1       | 2       | 2.5   | 15784.072 | 0.003      | 1.0     |
|                      | 5    | 0      | 5      | 5.5  | 4     | 1       | 3       | 4.5   | 15784.305 | -0.001     | 1.0     |
|                      | 5    | 0      | 5      | 4.5  | 4     | 1       | 3       | 3.5   | 15784.197 | -0.001     | 0.1     |
| $K_a' - K_a'' = 1-0$ |      |        |        |      |       |         |         |       |           |            |         |
| P                    | 1    | 1      | 0      | 1.5  | 2     | 0       | 2       | 2.5   | 15796.939 | -0.003     | 1.0     |
|                      | 1    | 1      | 0      | 0.5  | 2     | 0       | 2       | 1.5   | 15796.540 | 0.003      | 1.0     |
|                      | 2    | 1      | 1      | 2.5  | 3     | 0       | 3       | 3.5   | 15795.176 | 0.000      | 1.0     |
|                      | 2    | 1      | 1      | 1.5  | 3     | 0       | 3       | 2.5   | 15794.974 | 0.001      | 1.0     |
|                      | 3    | 1      | 2      | 3.5  | 4     | 0       | 4       | 4.5   | 15793.225 | -0.002     | 1.0     |

**Table A1**

**Continued**

|   | $N'$ | $K_a'$ | $K_c'$ | $J'$ | $N''$ | $K_a''$ | $K_c''$ | $J''$ | Obs.                 | Obs.-Calc. | Weight. |
|---|------|--------|--------|------|-------|---------|---------|-------|----------------------|------------|---------|
|   | 3    | 1      | 2      | 2.5  | 4     | 0       | 4       | 3.5   | 15793.079            | 0.004      | 1.0     |
|   | 4    | 1      | 3      | 4.5  | 5     | 0       | 5       | 5.5   | 15791.076            | -0.005     | 1.0     |
|   | 4    | 1      | 3      | 3.5  | 5     | 0       | 5       | 4.5   | 15790.955            | 0.001      | 1.0     |
|   | 5    | 1      | 4      | 5.5  | 6     | 0       | 6       | 6.5   | 15788.742            | 0.005      | 0.1     |
|   | 5    | 1      | 4      | 4.5  | 6     | 0       | 6       | 5.5   | 15788.615            | -0.008     | 0.1     |
| Q | 1    | 1      | 1      | 1.5  | 1     | 0       | 1       | 1.5   | 15799.536            | -0.007     | 1.0     |
|   | 1    | 1      | 1      | 0.5  | 1     | 0       | 1       | 0.5   | 15799.157            | 0.002      | 1.0     |
|   | 2    | 1      | 2      | 2.5  | 2     | 0       | 2       | 2.5   | 15799.022            | -0.001     | 1.0     |
|   | 2    | 1      | 2      | 1.5  | 2     | 0       | 2       | 1.5   | 15798.849            | 0.005      | 1.0     |
|   | 3    | 1      | 3      | 3.5  | 3     | 0       | 3       | 3.5   | 15798.286            | 0.003      | 1.0     |
|   | 3    | 1      | 3      | 2.5  | 3     | 0       | 3       | 2.5   | 15798.160            | -0.001     | 1.0     |
|   | 4    | 1      | 4      | 4.5  | 4     | 0       | 4       | 4.5   | 15797.312            | 0.003      | 1.0     |
|   | 4    | 1      | 4      | 3.5  | 4     | 0       | 4       | 3.5   | 15797.214            | -0.004     | 1.0     |
|   | 5    | 1      | 5      | 5.5  | 5     | 0       | 5       | 5.5   | 15796.095            | -0.005     | 1.0     |
|   | 5    | 1      | 5      | 4.5  | 5     | 0       | 5       | 4.5   | 15796.025            | -0.004     | 1.0     |
|   | 6    | 1      | 6      | 6.5  | 6     | 0       | 6       | 6.5   | 15794.648            | -0.005     | 1.0     |
|   | 6    | 1      | 6      | 5.5  | 6     | 0       | 6       | 5.5   | 15794.598            | 0.001      | 1.0     |
| R | 1    | 1      | 0      | 1.5  | 0     | 0       | 0       | 0.5   | 15800.902            | 0.001      | 1.0     |
|   | 1    | 1      | 0      | 0.5  | 0     | 0       | 0       | 0.5   | 15800.514            | 0.000      | 1.0     |
|   | 2    | 1      | 1      | 2.5  | 1     | 0       | 1       | 1.5   | 15801.782            | 0.003      | 1.0     |
|   | 2    | 1      | 1      | 1.5  | 1     | 0       | 1       | 0.5   | 15801.590            | 0.000      | 1.0     |
|   | 3    | 1      | 2      | 3.5  | 2     | 0       | 2       | 2.5   | 15802.471            | -0.001     | 1.0     |
|   | 3    | 1      | 2      | 2.5  | 2     | 0       | 2       | 1.5   | 15802.336            | 0.001      | 1.0     |
|   | 4    | 1      | 3      | 4.5  | 3     | 0       | 3       | 3.5   | 15802.968            | -0.001     | 1.0     |
|   | 4    | 1      | 3      | 3.5  | 3     | 0       | 3       | 2.5   | 15802.852            | -0.003     | 1.0     |
|   | 5    | 1      | 4      | 5.5  | 4     | 0       | 4       | 4.5   | 15803.261            | -0.004     | 1.0     |
|   | 5    | 1      | 4      | 4.5  | 4     | 0       | 4       | 3.5   | 15803.161            | -0.002     | 1.0     |
|   | 6    | 1      | 5      | 6.5  | 5     | 0       | 5       | 5.5   | 15803.360            | 0.001      | 1.0     |
|   | 6    | 1      | 5      | 5.5  | 5     | 0       | 5       | 4.5   | 15803.261            | -0.004     | 1.0     |
|   |      |        |        |      |       |         |         |       | $K_a' - K_a'' = 2-1$ |            |         |
| P | 2    | 2      | 1      | 2.5  | 3     | 1       | 3       | 3.5   | 15813.587            | 0.005      | 1.0     |
|   | 2    | 2      | 1      | 1.5  | 3     | 1       | 3       | 2.5   | 15812.605            | 0.001      | 1.0     |
|   | 2    | 2      | 0      | 2.5  | 3     | 1       | 2       | 3.5   | 15813.326            | 0.007      | 1.0     |
|   | 2    | 2      | 0      | 1.5  | 3     | 1       | 2       | 2.5   | 15812.325            | 0.009      | 0.1     |

**Table A1**

**Continued**

|   | $N'$ | $K_a'$ | $K_c'$ | $J'$ | $N''$ | $K_a''$ | $K_c''$ | $J''$ | Obs.      | Obs.-Calc. | Weight. |
|---|------|--------|--------|------|-------|---------|---------|-------|-----------|------------|---------|
|   | 3    | 2      | 2      | 3.5  | 4     | 1       | 4       | 4.5   | 15811.580 | -0.005     | 1.0     |
|   | 3    | 2      | 2      | 2.5  | 4     | 1       | 4       | 3.5   | 15810.974 | 0.001      | 1.0     |
|   | 3    | 2      | 1      | 3.5  | 4     | 1       | 3       | 4.5   | 15811.147 | 0.004      | 1.0     |
|   | 3    | 2      | 1      | 2.5  | 4     | 1       | 3       | 3.5   | 15810.502 | 0.003      | 0.1     |
|   | 4    | 2      | 3      | 4.5  | 5     | 1       | 5       | 5.5   | 15809.429 | -0.001     | 1.0     |
|   | 4    | 2      | 3      | 3.5  | 5     | 1       | 5       | 4.5   | 15808.970 | 0.001      | 1.0     |
|   | 4    | 2      | 2      | 4.5  | 5     | 1       | 4       | 5.5   | 15808.764 | -0.001     | 1.0     |
|   | 4    | 2      | 2      | 3.5  | 5     | 1       | 4       | 4.5   | 15808.266 | 0.000      | 0.1     |
| Q | 2    | 2      | 0      | 2.5  | 2     | 1       | 2       | 2.5   | 15816.497 | 0.004      | 1.0     |
|   | 2    | 2      | 0      | 1.5  | 2     | 1       | 2       | 1.5   | 15816.476 | 0.002      | 1.0     |
|   | 2    | 2      | 1      | 2.5  | 2     | 1       | 1       | 2.5   | 15817.360 | -0.004     | 1.0     |
|   | 2    | 2      | 1      | 1.5  | 2     | 1       | 1       | 1.5   | 15816.325 | -0.001     | 1.0     |
|   | 3    | 2      | 1      | 3.5  | 3     | 1       | 3       | 3.5   | 15816.789 | -0.000     | 1.0     |
|   | 3    | 2      | 1      | 2.5  | 3     | 1       | 3       | 2.5   | 15816.158 | 0.002      | 1.0     |
|   | 3    | 2      | 2      | 3.5  | 3     | 1       | 2       | 3.5   | 15816.522 | -0.004     | 1.0     |
|   | 3    | 2      | 2      | 2.5  | 3     | 1       | 2       | 2.5   | 15815.865 | -0.003     | 1.0     |
|   | 4    | 2      | 2      | 4.5  | 4     | 1       | 4       | 4.5   | 15815.935 | 0.003      | 1.0     |
|   | 4    | 2      | 3      | 4.5  | 4     | 1       | 3       | 4.5   | 15815.481 | -0.007     | 1.0     |
|   | 4    | 2      | 3      | 3.5  | 4     | 1       | 3       | 3.5   | 15814.988 | 0.004      | 1.0     |
|   | 5    | 2      | 3      | 5.5  | 5     | 1       | 5       | 5.5   | 15814.898 | 0.003      | 0.1     |
|   | 5    | 2      | 3      | 4.5  | 5     | 1       | 5       | 4.5   | 15814.514 | -0.002     | 0.1     |
|   | 5    | 2      | 4      | 5.5  | 5     | 1       | 4       | 5.5   | 15814.229 | 0.005      | 1.0     |
|   | 5    | 2      | 4      | 4.5  | 5     | 1       | 4       | 4.5   | 15813.870 | 0.063      | 0.1     |
| R | 2    | 2      | 1      | 2.5  | 1     | 1       | 1       | 1.5   | 15820.116 | -0.004     | 1.0     |
|   | 2    | 2      | 1      | 1.5  | 1     | 1       | 1       | 0.5   | 15818.990 | -0.007     | 1.0     |
|   | 2    | 2      | 0      | 2.5  | 1     | 1       | 0       | 1.5   | 15820.072 | -0.006     | 1.0     |
|   | 2    | 2      | 0      | 1.5  | 1     | 1       | 0       | 0.5   | 15818.942 | -0.003     | 1.0     |
|   | 3    | 2      | 2      | 3.5  | 2     | 1       | 2       | 2.5   | 15820.699 | -0.001     | 1.0     |
|   | 3    | 2      | 2      | 2.5  | 2     | 1       | 2       | 1.5   | 15820.021 | -0.005     | 1.0     |
|   | 3    | 2      | 1      | 3.5  | 2     | 1       | 1       | 2.5   | 15820.566 | -0.005     | 1.0     |
|   | 3    | 2      | 1      | 2.5  | 2     | 1       | 1       | 1.5   | 15819.882 | 0.003      | 1.0     |
|   | 4    | 2      | 3      | 4.5  | 3     | 1       | 3       | 3.5   | 15821.143 | 0.008      | 1.0     |
|   | 4    | 2      | 3      | 3.5  | 3     | 1       | 3       | 2.5   | 15820.641 | 0.001      | 1.0     |
|   | 4    | 2      | 2      | 4.5  | 3     | 1       | 2       | 3.5   | 15820.873 | -0.000     | 1.0     |
|   | 4    | 2      | 2      | 3.5  | 3     | 1       | 2       | 2.5   | 15820.359 | 0.005      | 0.1     |

**Table A1**

**Continued**

| $N'$ | $K_a'$ | $K_c'$ | $J'$ | $N''$ | $K_a''$ | $K_c''$ | $J''$ | Obs.      | Obs.-Calc. | Weight. |
|------|--------|--------|------|-------|---------|---------|-------|-----------|------------|---------|
| 5    | 2      | 4      | 5.5  | 4     | 1       | 4       | 4.5   | 15821.391 | 0.000      | 1.0     |
| 5    | 2      | 4      | 4.5  | 4     | 1       | 4       | 3.5   | 15821.009 | 0.009      | 0.1     |
| 5    | 2      | 3      | 5.5  | 4     | 1       | 3       | 4.5   | 15820.961 | 0.009      | 0.1     |
| 6    | 2      | 5      | 6.5  | 5     | 1       | 5       | 5.5   | 15821.464 | 0.005      | 1.0     |

$\tilde{A}(013) - \tilde{X}(001)$

$K_a' - K_a'' = 0-1$

|                      |   |   |   |     |   |   |   |     |           |        |     |
|----------------------|---|---|---|-----|---|---|---|-----|-----------|--------|-----|
| P                    | 1 | 0 | 1 | 1.5 | 2 | 1 | 1 | 2.5 | 16245.423 | -0.002 | 1.0 |
|                      | 1 | 0 | 1 | 0.5 | 2 | 1 | 1 | 1.5 | 16245.232 | -0.012 | 1.0 |
|                      | 2 | 0 | 2 | 2.5 | 3 | 1 | 2 | 3.5 | 16243.587 | -0.004 | 1.0 |
|                      | 2 | 0 | 2 | 1.5 | 3 | 1 | 2 | 2.5 | 16243.443 | -0.005 | 1.0 |
|                      | 3 | 0 | 3 | 3.5 | 4 | 1 | 3 | 4.5 | 16241.522 | 0.004  | 1.0 |
|                      | 3 | 0 | 3 | 2.5 | 4 | 1 | 3 | 3.5 | 16241.388 | -0.007 | 0.1 |
| Q                    | 1 | 0 | 1 | 1.5 | 1 | 1 | 1 | 1.5 | 16248.180 | 0.007  | 1.0 |
|                      | 1 | 0 | 1 | 0.5 | 1 | 1 | 1 | 0.5 | 16247.903 | 0.001  | 1.0 |
|                      | 2 | 0 | 2 | 2.5 | 2 | 1 | 2 | 2.5 | 16247.759 | 0.002  | 1.0 |
|                      | 2 | 0 | 2 | 1.5 | 2 | 1 | 2 | 1.5 | 16247.602 | 0.006  | 1.0 |
|                      | 3 | 0 | 3 | 3.5 | 3 | 1 | 3 | 3.5 | 16247.167 | 0.004  | 1.0 |
|                      | 3 | 0 | 3 | 2.5 | 3 | 1 | 3 | 2.5 | 16247.040 | -0.010 | 1.0 |
|                      | 4 | 0 | 4 | 4.5 | 4 | 1 | 4 | 4.5 | 16246.372 | -0.009 | 1.0 |
|                      | 4 | 0 | 4 | 3.5 | 4 | 1 | 4 | 3.5 | 16246.297 | 0.004  | 0.1 |
| R                    | 2 | 0 | 2 | 2.5 | 1 | 1 | 0 | 1.5 | 16250.323 | 0.007  | 1.0 |
|                      | 2 | 0 | 2 | 1.5 | 1 | 1 | 0 | 0.5 | 16250.039 | 0.001  | 0.1 |
|                      | 3 | 0 | 3 | 3.5 | 2 | 1 | 1 | 2.5 | 16250.900 | 0.002  | 1.0 |
|                      | 3 | 0 | 3 | 2.5 | 2 | 1 | 1 | 1.5 | 16250.735 | 0.011  | 1.0 |
|                      | 4 | 0 | 4 | 4.5 | 3 | 1 | 2 | 3.5 | 16251.246 | -0.006 | 1.0 |
|                      | 4 | 0 | 4 | 3.5 | 3 | 1 | 2 | 2.5 | 16251.115 | -0.004 | 1.0 |
| $K_a' - K_a'' = 1-0$ |   |   |   |     |   |   |   |     |           |        |     |
| P                    | 1 | 1 | 0 | 1.5 | 2 | 0 | 2 | 2.5 | 16264.417 | 0.003  | 1.0 |
|                      | 1 | 1 | 0 | 0.5 | 2 | 0 | 2 | 1.5 | 16263.955 | 0.002  | 1.0 |
|                      | 2 | 1 | 1 | 2.5 | 3 | 0 | 3 | 3.5 | 16262.662 | -0.005 | 1.0 |
|                      | 2 | 1 | 1 | 1.5 | 3 | 0 | 3 | 2.5 | 16262.440 | -0.001 | 1.0 |
|                      | 3 | 1 | 2 | 3.5 | 4 | 0 | 4 | 4.5 | 16260.745 | 0.000  | 1.0 |
|                      | 3 | 1 | 2 | 2.5 | 4 | 0 | 4 | 3.5 | 16260.566 | -0.008 | 1.0 |

**Table A1**

**Continued**

|   | $N'$                 | $K_a'$ | $K_c'$ | $J'$ | $N''$ | $K_a''$ | $K_c''$ | $J''$ | Obs.      | Obs.-Calc. | Weight. |
|---|----------------------|--------|--------|------|-------|---------|---------|-------|-----------|------------|---------|
|   | 4                    | 1      | 3      | 4.5  | 5     | 0       | 5       | 5.5   | 16258.640 | 0.006      | 0.1     |
|   | 4                    | 1      | 3      | 3.5  | 5     | 0       | 5       | 4.5   | 16258.499 | 0.011      | 0.1     |
| Q | 1                    | 1      | 1      | 1.5  | 1     | 0       | 1       | 1.5   | 16266.992 | -0.000     | 1.0     |
|   | 1                    | 1      | 1      | 0.5  | 1     | 0       | 1       | 0.5   | 16266.555 | 0.004      | 1.0     |
|   | 2                    | 1      | 2      | 2.5  | 2     | 0       | 2       | 2.5   | 16266.475 | 0.004      | 1.0     |
|   | 2                    | 1      | 2      | 1.5  | 2     | 0       | 2       | 1.5   | 16266.274 | -0.003     | 1.0     |
|   | 3                    | 1      | 3      | 3.5  | 3     | 0       | 3       | 3.5   | 16265.731 | -0.004     | 1.0     |
|   | 3                    | 1      | 3      | 2.5  | 3     | 0       | 3       | 2.5   | 16265.604 | -0.002     | 1.0     |
|   | 4                    | 1      | 4      | 4.5  | 4     | 0       | 4       | 4.5   | 16264.772 | 0.002      | 1.0     |
|   | 4                    | 1      | 4      | 3.5  | 4     | 0       | 4       | 3.5   | 16264.681 | 0.008      | 1.0     |
|   | 5                    | 1      | 5      | 5.5  | 5     | 0       | 5       | 5.5   | 16263.568 | -0.002     | 1.0     |
|   | 5                    | 1      | 5      | 4.5  | 5     | 0       | 5       | 4.5   | 16263.483 | -0.013     | 0.1     |
|   | 6                    | 1      | 6      | 6.5  | 6     | 0       | 6       | 6.5   | 16262.147 | 0.012      | 0.1     |
| R | 1                    | 1      | 0      | 1.5  | 0     | 0       | 0       | 0.5   | 16268.346 | -0.001     | 1.0     |
|   | 1                    | 1      | 0      | 0.5  | 0     | 0       | 0       | 0.5   | 16267.902 | -0.001     | 1.0     |
|   | 2                    | 1      | 1      | 2.5  | 1     | 0       | 1       | 1.5   | 16269.224 | -0.001     | 1.0     |
|   | 2                    | 1      | 1      | 1.5  | 1     | 0       | 1       | 0.5   | 16269.027 | 0.013      | 1.0     |
|   | 3                    | 1      | 2      | 3.5  | 2     | 0       | 2       | 2.5   | 16269.933 | 0.004      | 1.0     |
|   | 3                    | 1      | 2      | 2.5  | 2     | 0       | 2       | 1.5   | 16269.774 | 0.002      | 1.0     |
|   | 4                    | 1      | 3      | 4.5  | 3     | 0       | 3       | 3.5   | 16270.441 | -0.003     | 1.0     |
|   | 4                    | 1      | 3      | 3.5  | 3     | 0       | 3       | 2.5   | 16270.305 | -0.005     | 1.0     |
|   | 5                    | 1      | 4      | 5.5  | 4     | 0       | 4       | 4.5   | 16270.765 | 0.001      | 1.0     |
|   | 5                    | 1      | 4      | 4.5  | 4     | 0       | 4       | 3.5   | 16270.647 | 0.004      | 1.0     |
|   | $K_a' - K_a'' = 2-1$ |        |        |      |       |         |         |       |           |            |         |
| Q | 2                    | 2      | 0      | 2.5  | 2     | 1       | 2       | 2.5   | 16285.753 | 0.002      | 1.0     |
|   | 2                    | 2      | 0      | 1.5  | 2     | 1       | 2       | 1.5   | 16284.593 | -0.016     | 0.1     |
|   | 2                    | 2      | 1      | 2.5  | 2     | 1       | 1       | 2.5   | 16285.607 | -0.002     | 1.0     |
|   | 2                    | 2      | 1      | 1.5  | 2     | 1       | 1       | 1.5   | 16284.454 | 0.005      | 1.0     |
|   | 3                    | 2      | 1      | 3.5  | 3     | 1       | 3       | 3.5   | 16285.055 | -0.003     | 1.0     |
|   | 3                    | 2      | 2      | 2.5  | 3     | 1       | 2       | 2.5   | 16284.054 | 0.002      | 1.0     |
|   | 4                    | 2      | 2      | 4.5  | 4     | 1       | 4       | 4.5   | 16284.224 | 0.001      | 0.1     |
|   | 4                    | 2      | 3      | 4.5  | 4     | 1       | 3       | 4.5   | 16283.742 | 0.006      | 0.1     |
|   | 4                    | 2      | 3      | 3.5  | 4     | 1       | 3       | 3.5   | 16283.182 | -0.005     | 0.1     |
| R | 2                    | 2      | 1      | 2.5  | 1     | 1       | 1       | 1.5   | 16288.358 | 0.001      | 1.0     |

**Table A1**

**Continued**

| $N'$ | $K_a'$ | $K_c'$ | $J'$ | $N''$ | $K_a''$ | $K_c''$ | $J''$ | Obs.      | Obs.-Calc. | Weight. |
|------|--------|--------|------|-------|---------|---------|-------|-----------|------------|---------|
| 2    | 2      | 1      | 1.5  | 1     | 1       | 1       | 0.5   | 16287.101 | -0.007     | 1.0     |
| 2    | 2      | 0      | 2.5  | 1     | 1       | 0       | 1.5   | 16288.310 | 0.000      | 1.0     |
| 2    | 2      | 0      | 1.5  | 1     | 1       | 0       | 0.5   | 16287.049 | -0.002     | 1.0     |
| 3    | 2      | 2      | 3.5  | 2     | 1       | 2       | 2.5   | 16288.930 | -0.005     | 1.0     |
| 3    | 2      | 2      | 2.5  | 2     | 1       | 2       | 1.5   | 16288.201 | 0.001      | 1.0     |
| 3    | 2      | 1      | 3.5  | 2     | 1       | 1       | 2.5   | 16288.782 | -0.011     | 0.1     |
| 3    | 2      | 1      | 2.5  | 2     | 1       | 1       | 1.5   | 16288.045 | 0.004      | 1.0     |
| 4    | 2      | 3      | 4.5  | 3     | 1       | 3       | 3.5   | 16289.382 | 0.002      | 1.0     |
| 4    | 2      | 2      | 4.5  | 3     | 1       | 2       | 3.5   | 16289.090 | -0.003     | 1.0     |
| 4    | 2      | 2      | 3.5  | 3     | 1       | 2       | 2.5   | 16288.526 | -0.004     | 1.0     |
| 5    | 2      | 4      | 5.5  | 4     | 1       | 4       | 4.5   | 16289.665 | 0.008      | 1.0     |

$\tilde{A}(003) - \tilde{X}(000)$

$$K_a' - K_a'' = 0-1$$

|   |   |   |   |     |   |   |   |     |           |        |     |
|---|---|---|---|-----|---|---|---|-----|-----------|--------|-----|
| P | 0 | 0 | 0 | 0.5 | 1 | 1 | 0 | 1.5 | 16472.449 | -0.002 | 1.0 |
|   | 0 | 0 | 0 | 0.5 | 1 | 1 | 0 | 0.5 | 16472.175 | 0.001  | 1.0 |
|   | 1 | 0 | 1 | 1.5 | 2 | 1 | 1 | 2.5 | 16470.826 | -0.001 | 1.0 |
|   | 1 | 0 | 1 | 0.5 | 2 | 1 | 1 | 1.5 | 16470.644 | -0.009 | 1.0 |
|   | 2 | 0 | 2 | 2.5 | 3 | 1 | 2 | 3.5 | 16468.966 | 0.003  | 1.0 |
|   | 2 | 0 | 2 | 1.5 | 3 | 1 | 2 | 2.5 | 16468.827 | -0.001 | 1.0 |
|   | 3 | 0 | 3 | 3.5 | 4 | 1 | 3 | 4.5 | 16466.857 | 0.004  | 1.0 |
|   | 3 | 0 | 3 | 2.5 | 4 | 1 | 3 | 3.5 | 16466.726 | -0.009 | 1.0 |
|   | 4 | 0 | 4 | 4.5 | 5 | 1 | 4 | 5.5 | 16464.487 | -0.004 | 1.0 |
|   | 4 | 0 | 4 | 3.5 | 5 | 1 | 4 | 4.5 | 16464.385 | 0.001  | 1.0 |
|   | 5 | 0 | 5 | 5.5 | 6 | 1 | 5 | 6.5 | 16461.870 | -0.007 | 1.0 |
|   | 5 | 0 | 5 | 4.5 | 6 | 1 | 5 | 5.5 | 16461.772 | -0.005 | 1.0 |
| Q | 1 | 0 | 1 | 1.5 | 1 | 1 | 1 | 1.5 | 16473.592 | 0.009  | 1.0 |
|   | 1 | 0 | 1 | 0.5 | 1 | 1 | 1 | 0.5 | 16473.324 | 0.001  | 1.0 |
|   | 2 | 0 | 2 | 2.5 | 2 | 1 | 2 | 2.5 | 16473.146 | 0.008  | 1.0 |
|   | 2 | 0 | 2 | 1.5 | 2 | 1 | 2 | 1.5 | 16472.980 | -0.005 | 1.0 |
|   | 3 | 0 | 3 | 3.5 | 3 | 1 | 3 | 3.5 | 16472.502 | 0.003  | 1.0 |
|   | 3 | 0 | 3 | 2.5 | 3 | 1 | 3 | 2.5 | 16472.396 | 0.003  | 1.0 |
|   | 4 | 0 | 4 | 4.5 | 4 | 1 | 4 | 4.5 | 16471.665 | 0.007  | 1.0 |
|   | 4 | 0 | 4 | 3.5 | 4 | 1 | 4 | 3.5 | 16471.581 | 0.003  | 1.0 |

**Table A1**

**Continued**

|   | $N'$                   | $K_a'$ | $K_c'$ | $J'$ | $N''$ | $K_a''$ | $K_c''$ | $J''$ | Obs.      | Obs.-Calc. | Weight. |
|---|------------------------|--------|--------|------|-------|---------|---------|-------|-----------|------------|---------|
|   | 5                      | 0      | 5      | 4.5  | 5     | 1       | 5       | 4.5   | 16470.553 | 0.005      | 1.0     |
|   | 6                      | 0      | 6      | 6.5  | 6     | 1       | 6       | 6.5   | 16469.363 | 0.004      | 1.0     |
|   | 6                      | 0      | 6      | 5.5  | 6     | 1       | 6       | 5.5   | 16469.313 | 0.005      | 1.0     |
|   | 7                      | 0      | 7      | 7.5  | 7     | 1       | 7       | 7.5   | 16467.901 | 0.004      | 1.0     |
|   | 7                      | 0      | 7      | 6.5  | 7     | 1       | 7       | 6.5   | 16467.861 | 0.005      | 1.0     |
| R | 2                      | 0      | 2      | 2.5  | 1     | 1       | 0       | 1.5   | 16475.724 | 0.002      | 1.0     |
|   | 2                      | 0      | 2      | 1.5  | 1     | 1       | 0       | 0.5   | 16475.460 | 0.004      | 1.0     |
|   | 3                      | 0      | 3      | 3.5  | 2     | 1       | 1       | 2.5   | 16476.285 | 0.004      | 1.0     |
|   | 3                      | 0      | 3      | 2.5  | 2     | 1       | 1       | 1.5   | 16476.115 | -0.000     | 1.0     |
|   | 4                      | 0      | 4      | 4.5  | 3     | 1       | 2       | 3.5   | 16476.602 | 0.002      | 1.0     |
|   | 4                      | 0      | 4      | 3.5  | 3     | 1       | 2       | 2.5   | 16476.482 | 0.009      | 1.0     |
|   | 5                      | 0      | 5      | 5.5  | 4     | 1       | 3       | 4.5   | 16476.676 | 0.006      | 1.0     |
|   | $K_a' - K_a'' = 1 - 0$ |        |        |      |       |         |         |       |           |            |         |
| P | 1                      | 1      | 0      | 1.5  | 2     | 0       | 2       | 2.5   | 16489.473 | -0.007     | 1.0     |
|   | 1                      | 1      | 0      | 0.5  | 2     | 0       | 2       | 1.5   | 16489.055 | 0.007      | 1.0     |
|   | 2                      | 1      | 1      | 2.5  | 3     | 0       | 3       | 3.5   | 16487.698 | 0.002      | 1.0     |
|   | 2                      | 1      | 1      | 1.5  | 3     | 0       | 3       | 2.5   | 16487.484 | -0.000     | 1.0     |
|   | 3                      | 1      | 2      | 3.5  | 4     | 0       | 4       | 4.5   | 16485.722 | -0.000     | 1.0     |
|   | 3                      | 1      | 2      | 2.5  | 4     | 0       | 4       | 3.5   | 16485.560 | -0.005     | 1.0     |
|   | 4                      | 1      | 3      | 4.5  | 5     | 0       | 5       | 5.5   | 16483.550 | 0.004      | 1.0     |
|   | 4                      | 1      | 3      | 3.5  | 5     | 0       | 5       | 4.5   | 16483.420 | 0.006      | 1.0     |
|   | 5                      | 1      | 4      | 5.5  | 6     | 0       | 6       | 6.5   | 16481.157 | -0.007     | 1.0     |
|   | 5                      | 1      | 4      | 4.5  | 6     | 0       | 6       | 5.5   | 16481.042 | -0.003     | 1.0     |
| Q | 1                      | 1      | 1      | 1.5  | 1     | 0       | 1       | 1.5   | 16492.077 | -0.004     | 1.0     |
|   | 1                      | 1      | 1      | 0.5  | 1     | 0       | 1       | 0.5   | 16491.664 | -0.001     | 1.0     |
|   | 2                      | 1      | 2      | 2.5  | 2     | 0       | 2       | 2.5   | 16491.537 | -0.005     | 1.0     |
|   | 2                      | 1      | 2      | 1.5  | 2     | 0       | 2       | 1.5   | 16491.346 | -0.008     | 1.0     |
|   | 3                      | 1      | 3      | 3.5  | 3     | 0       | 3       | 3.5   | 16490.778 | 0.002      | 1.0     |
|   | 3                      | 1      | 3      | 2.5  | 3     | 0       | 3       | 2.5   | 16490.653 | 0.003      | 1.0     |
|   | 4                      | 1      | 4      | 4.5  | 4     | 0       | 4       | 4.5   | 16489.770 | 0.000      | 1.0     |
|   | 4                      | 1      | 4      | 3.5  | 4     | 0       | 4       | 3.5   | 16489.679 | 0.004      | 1.0     |
|   | 5                      | 1      | 5      | 5.5  | 5     | 0       | 5       | 5.5   | 16488.513 | -0.006     | 1.0     |
|   | 5                      | 1      | 5      | 4.5  | 5     | 0       | 5       | 4.5   | 16488.444 | -0.001     | 1.0     |
|   | 6                      | 1      | 6      | 6.5  | 6     | 0       | 6       | 6.5   | 16487.019 | -0.006     | 1.0     |

**Table A1**

**Continued**

|   | $N'$                 | $K_a'$ | $K_c'$ | $J'$ | $N''$ | $K_a''$ | $K_c''$ | $J''$ | Obs.      | Obs.-Calc. | Weight. |
|---|----------------------|--------|--------|------|-------|---------|---------|-------|-----------|------------|---------|
|   | 6                    | 1      | 6      | 5.5  | 6     | 0       | 6       | 5.5   | 16486.960 | -0.005     | 1.0     |
| R | 1                    | 1      | 0      | 1.5  | 0     | 0       | 0       | 0.5   | 16493.431 | -0.008     | 1.0     |
|   | 1                    | 1      | 0      | 0.5  | 0     | 0       | 0       | 0.5   | 16493.023 | -0.002     | 1.0     |
|   | 2                    | 1      | 1      | 2.5  | 1     | 0       | 1       | 1.5   | 16494.301 | 0.002      | 1.0     |
|   | 2                    | 1      | 1      | 1.5  | 1     | 0       | 1       | 0.5   | 16494.104 | 0.003      | 1.0     |
|   | 3                    | 1      | 2      | 3.5  | 2     | 0       | 2       | 2.5   | 16494.961 | -0.007     | 1.0     |
|   | 3                    | 1      | 2      | 2.5  | 2     | 0       | 2       | 1.5   | 16494.818 | -0.006     | 1.0     |
|   | 4                    | 1      | 3      | 4.5  | 3     | 0       | 3       | 3.5   | 16495.424 | -0.009     | 1.0     |
|   | 4                    | 1      | 3      | 3.5  | 3     | 0       | 3       | 2.5   | 16495.307 | -0.008     | 1.0     |
|   | 5                    | 1      | 4      | 5.5  | 4     | 0       | 4       | 4.5   | 16495.691 | 0.000      | 1.0     |
|   | 5                    | 1      | 4      | 4.5  | 4     | 0       | 4       | 3.5   | 16495.585 | 0.000      | 1.0     |
|   | $K_a' - K_a'' = 2-1$ |        |        |      |       |         |         |       |           |            |         |
| P | 2                    | 2      | 1      | 2.5  | 3     | 1       | 3       | 3.5   | 16506.275 | -0.008     | 0.1     |
|   | 2                    | 2      | 1      | 1.5  | 3     | 1       | 3       | 2.5   | 16505.266 | 0.018      | 0.1     |
|   | 2                    | 2      | 0      | 2.5  | 3     | 1       | 2       | 3.5   | 16506.027 | 0.007      | 1.0     |
|   | 2                    | 2      | 0      | 1.5  | 3     | 1       | 2       | 2.5   | 16504.959 | -0.001     | 1.0     |
| Q | 2                    | 2      | 0      | 2.5  | 2     | 1       | 2       | 2.5   | 16510.193 | -0.003     | 1.0     |
|   | 2                    | 2      | 0      | 1.5  | 2     | 1       | 2       | 1.5   | 16509.121 | 0.003      | 1.0     |
|   | 2                    | 2      | 1      | 2.5  | 2     | 1       | 1       | 2.5   | 16510.069 | 0.003      | 1.0     |
|   | 2                    | 2      | 1      | 1.5  | 2     | 1       | 1       | 1.5   | 16508.975 | 0.004      | 1.0     |
|   | 3                    | 2      | 1      | 3.5  | 3     | 1       | 3       | 3.5   | 16509.463 | 0.001      | 1.0     |
|   | 3                    | 2      | 1      | 2.5  | 3     | 1       | 3       | 2.5   | 16508.797 | -0.006     | 1.0     |
|   | 3                    | 2      | 2      | 3.5  | 3     | 1       | 2       | 3.5   | 16509.205 | 0.007      | 1.0     |
|   | 3                    | 2      | 2      | 2.5  | 3     | 1       | 2       | 2.5   | 16508.509 | -0.006     | 1.0     |
|   | 4                    | 2      | 2      | 4.5  | 4     | 1       | 4       | 4.5   | 16508.570 | -0.000     | 1.0     |
|   | 4                    | 2      | 2      | 3.5  | 4     | 1       | 4       | 3.5   | 16508.082 | 0.004      | 1.0     |
|   | 4                    | 2      | 3      | 4.5  | 4     | 1       | 3       | 4.5   | 16508.122 | -0.005     | 1.0     |
|   | 4                    | 2      | 3      | 3.5  | 4     | 1       | 3       | 3.5   | 16507.599 | -0.005     | 1.0     |
|   | 5                    | 2      | 3      | 5.5  | 5     | 1       | 5       | 5.5   | 16507.497 | 0.005      | 1.0     |
|   | 5                    | 2      | 3      | 4.5  | 5     | 1       | 5       | 4.5   | 16507.103 | 0.004      | 1.0     |
|   | 5                    | 2      | 4      | 5.5  | 5     | 1       | 4       | 5.5   | 16506.817 | -0.005     | 1.0     |
|   | 5                    | 2      | 4      | 4.5  | 5     | 1       | 4       | 4.5   | 16506.380 | -0.009     | 1.0     |
| R | 2                    | 2      | 1      | 2.5  | 1     | 1       | 1       | 1.5   | 16512.828 | 0.007      | 1.0     |

**Table A1**

**Continued**

| $N'$ | $K_a'$ | $K_c'$ | $J'$ | $N''$ | $K_a''$ | $K_c''$ | $J''$ | Obs.      | Obs.-Calc. | Weight. |
|------|--------|--------|------|-------|---------|---------|-------|-----------|------------|---------|
| 2    | 2      | 1      | 1.5  | 1     | 1       | 1       | 0.5   | 16511.640 | -0.001     | 1.0     |
| 2    | 2      | 0      | 2.5  | 1     | 1       | 0       | 1.5   | 16512.780 | 0.001      | 1.0     |
| 2    | 2      | 0      | 1.5  | 1     | 1       | 0       | 0.5   | 16511.586 | -0.003     | 1.0     |
| 3    | 2      | 2      | 3.5  | 2     | 1       | 2       | 2.5   | 16513.378 | 0.004      | 1.0     |
| 3    | 2      | 2      | 2.5  | 2     | 1       | 2       | 1.5   | 16512.677 | 0.005      | 1.0     |
| 3    | 2      | 1      | 3.5  | 2     | 1       | 1       | 2.5   | 16513.258 | 0.014      | 0.1     |
| 3    | 2      | 1      | 2.5  | 2     | 1       | 1       | 1.5   | 16512.528 | 0.003      | 1.0     |
| 4    | 2      | 3      | 4.5  | 3     | 1       | 3       | 3.5   | 16513.774 | 0.001      | 1.0     |
| 4    | 2      | 3      | 3.5  | 3     | 1       | 3       | 2.5   | 16513.258 | -0.002     | 1.0     |
| 4    | 2      | 2      | 4.5  | 3     | 1       | 2       | 3.5   | 16513.511 | -0.000     | 1.0     |
| 4    | 2      | 2      | 3.5  | 3     | 1       | 2       | 2.5   | 16512.982 | 0.008      | 1.0     |
| 5    | 2      | 4      | 5.5  | 4     | 1       | 4       | 4.5   | 16514.001 | 0.012      | 0.1     |
| 5    | 2      | 3      | 5.5  | 4     | 1       | 3       | 4.5   | 16513.543 | -0.008     | 1.0     |

$\tilde{A}(004) - \tilde{X}(000)$

$K_a' - K_a'' = 0-1$

|   |   |   |   |     |   |   |   |     |           |        |     |
|---|---|---|---|-----|---|---|---|-----|-----------|--------|-----|
| P | 0 | 0 | 0 | 0.5 | 1 | 1 | 0 | 1.5 | 17157.644 | 0.006  | 0.1 |
|   | 0 | 0 | 0 | 0.5 | 1 | 1 | 0 | 0.5 | 17157.359 | -0.001 | 1.0 |
|   | 1 | 0 | 1 | 1.5 | 2 | 1 | 1 | 2.5 | 17156.007 | 0.001  | 1.0 |
|   | 1 | 0 | 1 | 0.5 | 2 | 1 | 1 | 1.5 | 17155.835 | 0.004  | 1.0 |
|   | 2 | 0 | 2 | 2.5 | 3 | 1 | 2 | 3.5 | 17154.124 | -0.003 | 1.0 |
|   | 2 | 0 | 2 | 1.5 | 3 | 1 | 2 | 2.5 | 17153.990 | 0.001  | 1.0 |
|   | 3 | 0 | 3 | 3.5 | 4 | 1 | 3 | 4.5 | 17151.998 | 0.005  | 1.0 |
|   | 3 | 0 | 3 | 2.5 | 4 | 1 | 3 | 3.5 | 17151.877 | 0.003  | 1.0 |
|   | 4 | 0 | 4 | 4.5 | 5 | 1 | 4 | 5.5 | 17149.593 | -0.007 | 1.0 |
|   | 4 | 0 | 4 | 3.5 | 5 | 1 | 4 | 4.5 | 17149.485 | -0.006 | 1.0 |
|   | 5 | 0 | 5 | 5.5 | 6 | 1 | 5 | 6.5 | 17146.945 | -0.001 | 1.0 |
|   | 5 | 0 | 5 | 4.5 | 6 | 1 | 5 | 5.5 | 17146.838 | -0.005 | 1.0 |
| Q | 1 | 0 | 1 | 1.5 | 1 | 1 | 1 | 1.5 | 17158.756 | -0.006 | 1.0 |
|   | 1 | 0 | 1 | 0.5 | 1 | 1 | 1 | 0.5 | 17158.500 | -0.001 | 1.0 |
|   | 2 | 0 | 2 | 2.5 | 2 | 1 | 2 | 2.5 | 17158.296 | -0.005 | 1.0 |
|   | 2 | 0 | 2 | 1.5 | 2 | 1 | 2 | 1.5 | 17158.139 | -0.008 | 1.0 |
|   | 3 | 0 | 3 | 3.5 | 3 | 1 | 3 | 3.5 | 17157.644 | 0.005  | 0.1 |
|   | 3 | 0 | 3 | 2.5 | 3 | 1 | 3 | 2.5 | 17157.528 | -0.003 | 1.0 |

**Table A1**

**Continued**

|   | $N'$ | $K_a'$ | $K_c'$ | $J'$ | $N''$ | $K_a''$ | $K_c''$ | $J''$                  | Obs.      | Obs.-Calc. | Weight. |
|---|------|--------|--------|------|-------|---------|---------|------------------------|-----------|------------|---------|
|   | 4    | 0      | 4      | 4.5  | 4     | 1       | 4       | 4.5                    | 17156.771 | 0.004      | 1.0     |
|   | 4    | 0      | 4      | 3.5  | 4     | 1       | 4       | 3.5                    | 17156.685 | 0.001      | 1.0     |
|   | 5    | 0      | 5      | 5.5  | 5     | 1       | 5       | 5.5                    | 17155.680 | -0.001     | 1.0     |
|   | 5    | 0      | 5      | 4.5  | 5     | 1       | 5       | 4.5                    | 17155.614 | -0.001     | 1.0     |
|   | 6    | 0      | 6      | 6.5  | 6     | 1       | 6       | 6.5                    | 17154.375 | -0.005     | 1.0     |
|   | 6    | 0      | 6      | 5.5  | 6     | 1       | 6       | 5.5                    | 17154.328 | 0.002      | 1.0     |
|   | 7    | 0      | 7      | 6.5  | 7     | 1       | 7       | 6.5                    | 17152.814 | -0.004     | 0.1     |
| R | 2    | 0      | 2      | 2.5  | 1     | 1       | 0       | 1.5                    | 17160.880 | -0.005     | 1.0     |
|   | 2    | 0      | 2      | 1.5  | 1     | 1       | 0       | 0.5                    | 17160.610 | -0.008     | 1.0     |
|   | 3    | 0      | 3      | 3.5  | 2     | 1       | 1       | 2.5                    | 17161.411 | -0.010     | 1.0     |
|   | 3    | 0      | 3      | 2.5  | 2     | 1       | 1       | 1.5                    | 17161.254 | 0.001      | 1.0     |
|   | 4    | 0      | 4      | 4.5  | 3     | 1       | 2       | 3.5                    | 17161.704 | -0.004     | 1.0     |
|   | 4    | 0      | 4      | 3.5  | 3     | 1       | 2       | 2.5                    | 17161.569 | -0.010     | 1.0     |
|   | 5    | 0      | 5      | 4.5  | 4     | 1       | 3       | 3.5                    | 17161.622 | -0.007     | 1.0     |
|   |      |        |        |      |       |         |         | $K_a' - K_a'' = 1 - 0$ |           |            |         |
| P | 1    | 1      | 0      | 1.5  | 2     | 0       | 2       | 2.5                    | 17174.722 | 0.001      | 1.0     |
|   | 1    | 1      | 0      | 0.5  | 2     | 0       | 2       | 1.5                    | 17174.264 | 0.000      | 1.0     |
|   | 2    | 1      | 1      | 2.5  | 3     | 0       | 3       | 3.5                    | 17172.926 | 0.004      | 1.0     |
|   | 2    | 1      | 1      | 1.5  | 3     | 0       | 3       | 2.5                    | 17172.698 | -0.003     | 1.0     |
|   | 3    | 1      | 2      | 3.5  | 4     | 0       | 4       | 4.5                    | 17170.920 | -0.007     | 1.0     |
|   | 3    | 1      | 2      | 2.5  | 4     | 0       | 4       | 3.5                    | 17170.764 | 0.003      | 1.0     |
|   | 4    | 1      | 3      | 4.5  | 5     | 0       | 5       | 5.5                    | 17168.718 | -0.004     | 1.0     |
|   | 4    | 1      | 3      | 3.5  | 5     | 0       | 5       | 4.5                    | 17168.582 | 0.001      | 1.0     |
|   | 5    | 1      | 4      | 5.5  | 6     | 0       | 6       | 6.5                    | 17166.293 | -0.011     | 0.1     |
|   | 5    | 1      | 4      | 4.5  | 6     | 0       | 6       | 5.5                    | 17166.180 | 0.004      | 1.0     |
|   | 6    | 1      | 5      | 6.5  | 7     | 0       | 7       | 7.5                    | 17163.668 | -0.005     | 1.0     |
|   | 6    | 1      | 5      | 5.5  | 7     | 0       | 7       | 6.5                    | 17163.552 | 0.000      | 1.0     |
| Q | 1    | 1      | 1      | 1.5  | 1     | 0       | 1       | 1.5                    | 17177.324 | 0.004      | 1.0     |
|   | 1    | 1      | 1      | 0.5  | 1     | 0       | 1       | 0.5                    | 17176.892 | 0.011      | 1.0     |
|   | 2    | 1      | 2      | 2.5  | 2     | 0       | 2       | 2.5                    | 17176.766 | 0.004      | 1.0     |
|   | 2    | 1      | 2      | 1.5  | 2     | 0       | 2       | 1.5                    | 17176.577 | 0.008      | 1.0     |
|   | 3    | 1      | 3      | 3.5  | 3     | 0       | 3       | 3.5                    | 17175.973 | 0.004      | 1.0     |
|   | 3    | 1      | 3      | 2.5  | 3     | 0       | 3       | 2.5                    | 17175.843 | 0.004      | 1.0     |



**Table A1**

**Continued**

|                                   | $N'$ | $K_a'$ | $K_c'$ | $J'$ | $N''$ | $K_a''$ | $K_c''$ | $J''$     | Obs.      | Obs.-Calc. | Weight. |
|-----------------------------------|------|--------|--------|------|-------|---------|---------|-----------|-----------|------------|---------|
| Q                                 | 2    | 2      | 0      | 2.5  | 2     | 1       | 2       | 2.5       | 17195.596 | 0.003      | 1.0     |
|                                   | 2    | 2      | 0      | 1.5  | 2     | 1       | 2       | 1.5       | 17194.459 | -0.003     | 1.0     |
|                                   | 2    | 2      | 1      | 2.5  | 2     | 1       | 1       | 2.5       | 17195.467 | 0.004      | 0.1     |
|                                   | 2    | 2      | 1      | 1.5  | 2     | 1       | 1       | 1.5       | 17194.307 | -0.007     | 1.0     |
|                                   | 3    | 2      | 1      | 3.5  | 3     | 1       | 3       | 3.5       | 17194.828 | -0.003     | 1.0     |
|                                   | 3    | 2      | 1      | 2.5  | 3     | 1       | 3       | 2.5       | 17194.148 | -0.000     | 1.0     |
|                                   | 3    | 2      | 2      | 3.5  | 3     | 1       | 2       | 3.5       | 17194.563 | -0.005     | 1.0     |
|                                   | 3    | 2      | 2      | 2.5  | 3     | 1       | 2       | 2.5       | 17193.867 | 0.007      | 1.0     |
|                                   | 4    | 2      | 2      | 4.5  | 4     | 1       | 4       | 4.5       | 17193.899 | -0.007     | 1.0     |
|                                   | 4    | 2      | 2      | 3.5  | 4     | 1       | 4       | 3.5       | 17193.395 | -0.002     | 1.0     |
|                                   | 4    | 2      | 3      | 4.5  | 4     | 1       | 3       | 4.5       | 17193.456 | -0.006     | 1.0     |
|                                   | 4    | 2      | 3      | 3.5  | 4     | 1       | 3       | 3.5       | 17192.918 | -0.003     | 1.0     |
|                                   | 5    | 2      | 3      | 5.5  | 5     | 1       | 5       | 5.5       | 17192.775 | -0.011     | 0.1     |
|                                   | 5    | 2      | 3      | 4.5  | 5     | 1       | 5       | 4.5       | 17192.370 | -0.008     | 1.0     |
|                                   | 5    | 2      | 4      | 5.5  | 5     | 1       | 4       | 5.5       | 17192.126 | 0.010      | 1.0     |
| R                                 | 2    | 2      | 1      | 2.5  | 1     | 1       | 1       | 1.5       | 17198.217 | -0.002     | 1.0     |
|                                   | 2    | 2      | 1      | 1.5  | 1     | 1       | 1       | 0.5       | 17196.981 | -0.005     | 1.0     |
|                                   | 2    | 2      | 0      | 2.5  | 1     | 1       | 0       | 1.5       | 17198.176 | -0.001     | 1.0     |
|                                   | 2    | 2      | 0      | 1.5  | 1     | 1       | 0       | 0.5       | 17196.939 | 0.006      | 1.0     |
|                                   | 3    | 2      | 2      | 3.5  | 2     | 1       | 2       | 2.5       | 17198.744 | 0.001      | 1.0     |
|                                   | 3    | 2      | 2      | 2.5  | 2     | 1       | 2       | 1.5       | 17198.022 | 0.004      | 1.0     |
|                                   | 3    | 2      | 1      | 3.5  | 2     | 1       | 1       | 2.5       | 17198.608 | -0.005     | 1.0     |
|                                   | 3    | 2      | 1      | 2.5  | 2     | 1       | 1       | 1.5       | 17197.868 | -0.003     | 1.0     |
|                                   | 4    | 2      | 3      | 4.5  | 3     | 1       | 3       | 3.5       | 17199.105 | -0.004     | 1.0     |
|                                   | 4    | 2      | 2      | 4.5  | 3     | 1       | 2       | 3.5       | 17198.853 | 0.006      | 1.0     |
|                                   | 4    | 2      | 2      | 3.5  | 3     | 1       | 2       | 2.5       | 17198.290 | -0.002     | 1.0     |
|                                   | 5    | 2      | 4      | 5.5  | 4     | 1       | 4       | 4.5       | 17199.279 | -0.004     | 1.0     |
| 5                                 | 2    | 3      | 4.5    | 4    | 1     | 3       | 3.5     | 17198.389 | -0.003    | 1.0        |         |
| $\tilde{A}(005) - \tilde{X}(000)$ |      |        |        |      |       |         |         |           |           |            |         |
| $K_a' - K_a'' = 0-1$              |      |        |        |      |       |         |         |           |           |            |         |
| P                                 | 0    | 0      | 0      | 0.5  | 1     | 1       | 0       | 0.5       | 17835.317 | 0.008      | 1.0     |
|                                   | 1    | 0      | 1      | 1.5  | 2     | 1       | 1       | 2.5       | 17833.942 | -0.005     | 1.0     |
|                                   | 1    | 0      | 1      | 0.5  | 2     | 1       | 1       | 1.5       | 17833.762 | -0.007     | 1.0     |



**Table A1**

**Continued**

|   | $N'$ | $K_a'$ | $K_c'$ | $J'$ | $N''$ | $K_a''$ | $K_c''$ | $J''$ | Obs.                 | Obs.-Calc. | Weight. |
|---|------|--------|--------|------|-------|---------|---------|-------|----------------------|------------|---------|
|   | 3    | 1      | 3      | 3.5  | 3     | 0       | 3       | 3.5   | 17853.926            | -0.002     | 1.0     |
|   | 3    | 1      | 3      | 2.5  | 3     | 0       | 3       | 2.5   | 17853.791            | 0.005      | 1.0     |
|   | 4    | 1      | 4      | 4.5  | 4     | 0       | 4       | 4.5   | 17852.849            | -0.005     | 1.0     |
|   | 4    | 1      | 4      | 3.5  | 4     | 0       | 4       | 3.5   | 17852.741            | -0.004     | 1.0     |
|   | 5    | 1      | 5      | 5.5  | 5     | 0       | 5       | 5.5   | 17851.522            | 0.003      | 1.0     |
|   | 5    | 1      | 5      | 4.5  | 5     | 0       | 5       | 4.5   | 17851.428            | -0.001     | 1.0     |
| R | 1    | 1      | 0      | 1.5  | 0     | 0       | 0       | 0.5   | 17856.679            | -0.000     | 1.0     |
|   | 1    | 1      | 0      | 0.5  | 0     | 0       | 0       | 0.5   | 17856.213            | -0.003     | 1.0     |
|   | 2    | 1      | 1      | 2.5  | 1     | 0       | 1       | 1.5   | 17857.508            | 0.001      | 1.0     |
|   | 2    | 1      | 1      | 1.5  | 1     | 0       | 1       | 0.5   | 17857.291            | -0.000     | 1.0     |
|   | 3    | 1      | 2      | 3.5  | 2     | 0       | 2       | 2.5   | 17858.128            | -0.003     | 1.0     |
|   | 3    | 1      | 2      | 2.5  | 2     | 0       | 2       | 1.5   | 17857.980            | 0.008      | 1.0     |
|   | 4    | 1      | 3      | 4.5  | 3     | 0       | 3       | 3.5   | 17858.540            | 0.004      | 1.0     |
|   | 4    | 1      | 3      | 3.5  | 3     | 0       | 3       | 2.5   | 17858.402            | 0.001      | 1.0     |
|   | 5    | 1      | 4      | 5.5  | 4     | 0       | 4       | 4.5   | 17858.716            | -0.002     | 1.0     |
|   |      |        |        |      |       |         |         |       | $K_a' - K_a'' = 2-1$ |            |         |
| P | 2    | 2      | 1      | 2.5  | 3     | 1       | 3       | 3.5   | 17869.837            | -0.001     | 1.0     |
|   | 2    | 2      | 1      | 1.5  | 3     | 1       | 3       | 2.5   | 17868.700            | 0.006      | 1.0     |
|   | 2    | 2      | 0      | 2.5  | 3     | 1       | 2       | 3.5   | 17869.578            | 0.003      | 1.0     |
|   | 2    | 2      | 0      | 1.5  | 3     | 1       | 2       | 2.5   | 17868.410            | 0.004      | 0.1     |
|   | 3    | 2      | 2      | 3.5  | 4     | 1       | 4       | 4.5   | 17867.761            | 0.005      | 1.0     |
|   | 3    | 2      | 2      | 2.5  | 4     | 1       | 4       | 3.5   | 17867.077            | 0.008      | 0.1     |
|   | 3    | 2      | 1      | 3.5  | 4     | 1       | 3       | 4.5   | 17867.310            | -0.004     | 0.1     |
| Q | 2    | 2      | 0      | 2.5  | 2     | 1       | 2       | 2.5   | 17873.751            | 0.002      | 1.0     |
|   | 2    | 2      | 0      | 1.5  | 2     | 1       | 2       | 1.5   | 17872.562            | -0.002     | 1.0     |
|   | 2    | 2      | 1      | 2.5  | 2     | 1       | 1       | 2.5   | 17873.612            | -0.007     | 1.0     |
|   | 2    | 2      | 1      | 1.5  | 2     | 1       | 1       | 1.5   | 17872.413            | -0.003     | 1.0     |
|   | 3    | 2      | 1      | 3.5  | 3     | 1       | 3       | 3.5   | 17872.961            | 0.000      | 1.0     |
|   | 3    | 2      | 1      | 2.5  | 3     | 1       | 3       | 2.5   | 17872.251            | -0.001     | 1.0     |
|   | 3    | 2      | 2      | 3.5  | 3     | 1       | 2       | 3.5   | 17872.690            | -0.007     | 0.1     |
|   | 3    | 2      | 2      | 2.5  | 3     | 1       | 2       | 2.5   | 17871.964            | 0.000      | 1.0     |
|   | 4    | 2      | 2      | 4.5  | 4     | 1       | 4       | 4.5   | 17871.997            | -0.004     | 0.1     |
|   | 4    | 2      | 2      | 3.5  | 4     | 1       | 4       | 3.5   | 17871.470            | -0.002     | 1.0     |

**Table A1**

**Continued**

|   | $N'$ | $K_a'$ | $K_c'$ | $J'$ | $N''$ | $K_a''$ | $K_c''$ | $J''$ | Obs.      | Obs.-Calc. | Weight. |
|---|------|--------|--------|------|-------|---------|---------|-------|-----------|------------|---------|
|   | 4    | 2      | 3      | 4.5  | 4     | 1       | 3       | 4.5   | 17871.556 | -0.001     | 1.0     |
|   | 4    | 2      | 3      | 3.5  | 4     | 1       | 3       | 3.5   | 17870.995 | -0.001     | 0.1     |
| R | 2    | 2      | 1      | 2.5  | 1     | 1       | 1       | 1.5   | 17876.364 | -0.012     | 0.1     |
|   | 2    | 2      | 1      | 1.5  | 1     | 1       | 1       | 0.5   | 17875.085 | -0.003     | 1.0     |
|   | 2    | 2      | 0      | 2.5  | 1     | 1       | 0       | 1.5   | 17876.329 | -0.005     | 1.0     |
|   | 2    | 2      | 0      | 1.5  | 1     | 1       | 0       | 0.5   | 17875.037 | 0.002      | 1.0     |
|   | 3    | 2      | 2      | 3.5  | 2     | 1       | 2       | 2.5   | 17876.870 | -0.001     | 1.0     |
|   | 3    | 2      | 2      | 2.5  | 2     | 1       | 2       | 1.5   | 17876.124 | 0.002      | 1.0     |
|   | 3    | 2      | 1      | 3.5  | 2     | 1       | 1       | 2.5   | 17876.740 | -0.003     | 1.0     |
|   | 3    | 2      | 1      | 2.5  | 2     | 1       | 1       | 1.5   | 17875.976 | 0.001      | 1.0     |
|   | 4    | 2      | 3      | 4.5  | 3     | 1       | 3       | 3.5   | 17877.206 | 0.002      | 1.0     |
|   | 4    | 2      | 3      | 3.5  | 3     | 1       | 3       | 2.5   | 17876.655 | 0.002      | 1.0     |
|   | 4    | 2      | 2      | 4.5  | 3     | 1       | 2       | 3.5   | 17876.946 | 0.004      | 1.0     |
|   | 4    | 2      | 2      | 3.5  | 3     | 1       | 2       | 2.5   | 17876.364 | -0.003     | 0.1     |
|   | 5    | 2      | 4      | 5.5  | 4     | 1       | 4       | 4.5   | 17877.344 | 0.008      | 0.1     |

$\tilde{A}(006) - \tilde{X}(000)$

$K_a' - K_a'' = 0-1$

|   |   |   |   |     |   |   |   |     |           |        |     |
|---|---|---|---|-----|---|---|---|-----|-----------|--------|-----|
| P | 0 | 0 | 0 | 0.5 | 1 | 1 | 0 | 1.5 | 18506.290 | -0.005 | 1.0 |
|   | 0 | 0 | 0 | 0.5 | 1 | 1 | 0 | 0.5 | 18506.010 | -0.007 | 1.0 |
|   | 1 | 0 | 1 | 1.5 | 2 | 1 | 1 | 2.5 | 18504.635 | -0.011 | 1.0 |
|   | 1 | 0 | 1 | 0.5 | 2 | 1 | 1 | 1.5 | 18504.462 | -0.007 | 1.0 |
|   | 2 | 0 | 2 | 2.5 | 3 | 1 | 2 | 3.5 | 18502.734 | 0.001  | 1.0 |
|   | 2 | 0 | 2 | 1.5 | 3 | 1 | 2 | 2.5 | 18502.588 | -0.006 | 1.0 |
|   | 3 | 0 | 3 | 3.5 | 4 | 1 | 3 | 4.5 | 18500.549 | 0.002  | 1.0 |
|   | 3 | 0 | 3 | 2.5 | 4 | 1 | 3 | 3.5 | 18500.426 | -0.001 | 1.0 |
| Q | 1 | 0 | 1 | 1.5 | 1 | 1 | 1 | 1.5 | 18507.402 | 0.001  | 1.0 |
|   | 1 | 0 | 1 | 0.5 | 1 | 1 | 1 | 0.5 | 18507.131 | -0.009 | 1.0 |
|   | 2 | 0 | 2 | 2.5 | 2 | 1 | 2 | 2.5 | 18506.899 | -0.008 | 1.0 |
|   | 2 | 0 | 2 | 1.5 | 2 | 1 | 2 | 1.5 | 18506.741 | -0.011 | 1.0 |
|   | 3 | 0 | 3 | 3.5 | 3 | 1 | 3 | 3.5 | 18506.202 | 0.009  | 1.0 |
|   | 3 | 0 | 3 | 2.5 | 3 | 1 | 3 | 2.5 | 18506.084 | 0.000  | 1.0 |

**Table A1**

**Continued**

|   | $N'$                   | $K_a'$ | $K_c'$ | $J'$ | $N''$ | $K_a''$ | $K_c''$ | $J''$ | Obs.      | Obs.-Calc. | Weight. |
|---|------------------------|--------|--------|------|-------|---------|---------|-------|-----------|------------|---------|
|   | 4                      | 0      | 4      | 4.5  | 4     | 1       | 4       | 4.5   | 18505.255 | 0.002      | 1.0     |
|   | 4                      | 0      | 4      | 3.5  | 4     | 1       | 4       | 3.5   | 18505.169 | 0.001      | 1.0     |
|   | 5                      | 0      | 5      | 5.5  | 5     | 1       | 5       | 5.5   | 18504.077 | -0.005     | 1.0     |
|   | 5                      | 0      | 5      | 4.5  | 5     | 1       | 5       | 4.5   | 18504.011 | -0.003     | 1.0     |
| R | 2                      | 0      | 2      | 2.5  | 1     | 1       | 0       | 1.5   | 18509.491 | -0.000     | 1.0     |
|   | 2                      | 0      | 2      | 1.5  | 1     | 1       | 0       | 0.5   | 18509.220 | -0.002     | 1.0     |
|   | 3                      | 0      | 3      | 3.5  | 2     | 1       | 1       | 2.5   | 18509.985 | 0.011      | 1.0     |
|   | 3                      | 0      | 3      | 2.5  | 2     | 1       | 1       | 1.5   | 18509.807 | 0.001      | 1.0     |
|   | 4                      | 0      | 4      | 4.5  | 3     | 1       | 2       | 3.5   | 18510.196 | 0.002      | 1.0     |
|   | 4                      | 0      | 4      | 3.5  | 3     | 1       | 2       | 2.5   | 18510.063 | -0.001     | 1.0     |
|   | $K_a' - K_a'' = 1 - 0$ |        |        |      |       |         |         |       |           |            |         |
| P | 1                      | 1      | 0      | 1.5  | 2     | 0       | 2       | 2.5   | 18523.472 | -0.001     | 1.0     |
|   | 1                      | 1      | 0      | 0.5  | 2     | 0       | 2       | 1.5   | 18522.961 | 0.001      | 1.0     |
|   | 2                      | 1      | 1      | 2.5  | 3     | 0       | 3       | 3.5   | 18521.644 | 0.007      | 1.0     |
|   | 2                      | 1      | 1      | 1.5  | 3     | 0       | 3       | 2.5   | 18521.405 | 0.005      | 1.0     |
|   | 3                      | 1      | 2      | 3.5  | 4     | 0       | 4       | 4.5   | 18519.583 | -0.008     | 1.0     |
|   | 3                      | 1      | 2      | 2.5  | 4     | 0       | 4       | 3.5   | 18519.403 | -0.010     | 1.0     |
| Q | 1                      | 1      | 1      | 1.5  | 1     | 0       | 1       | 1.5   | 18526.072 | 0.000      | 1.0     |
|   | 1                      | 1      | 1      | 0.5  | 1     | 0       | 1       | 0.5   | 18525.576 | -0.001     | 1.0     |
|   | 2                      | 1      | 2      | 2.5  | 2     | 0       | 2       | 2.5   | 18525.479 | 0.004      | 1.0     |
|   | 2                      | 1      | 2      | 1.5  | 2     | 0       | 2       | 1.5   | 18525.265 | -0.002     | 1.0     |
|   | 3                      | 1      | 3      | 3.5  | 3     | 0       | 3       | 3.5   | 18524.633 | 0.005      | 1.0     |
|   | 3                      | 1      | 3      | 2.5  | 3     | 0       | 3       | 2.5   | 18524.493 | 0.005      | 1.0     |
|   | 4                      | 1      | 4      | 4.5  | 4     | 0       | 4       | 4.5   | 18523.521 | 0.005      | 1.0     |
|   | 4                      | 1      | 4      | 3.5  | 4     | 0       | 4       | 3.5   | 18523.419 | 0.008      | 1.0     |
|   | 5                      | 1      | 5      | 5.5  | 5     | 0       | 5       | 5.5   | 18522.136 | 0.003      | 1.0     |
|   | 5                      | 1      | 5      | 4.5  | 5     | 0       | 5       | 4.5   | 18522.048 | -0.002     | 1.0     |
| R | 1                      | 1      | 0      | 1.5  | 0     | 0       | 0       | 0.5   | 18527.434 | 0.002      | 1.0     |
|   | 1                      | 1      | 0      | 0.5  | 0     | 0       | 0       | 0.5   | 18526.942 | 0.005      | 1.0     |
|   | 2                      | 1      | 1      | 2.5  | 1     | 0       | 1       | 1.5   | 18528.247 | 0.007      | 1.0     |
|   | 2                      | 1      | 1      | 1.5  | 1     | 0       | 1       | 0.5   | 18528.021 | 0.004      | 1.0     |
|   | 3                      | 1      | 2      | 3.5  | 2     | 0       | 2       | 2.5   | 18528.836 | -0.001     | 1.0     |
|   | 3                      | 1      | 2      | 2.5  | 2     | 0       | 2       | 1.5   | 18528.671 | -0.002     | 1.0     |

**Table A1**

**Continued**

|                        | $N'$ | $K_a'$ | $K_c'$ | $J'$ | $N''$ | $K_a''$ | $K_c''$ | $J''$ | Obs.      | Obs.-Calc. | Weight. |
|------------------------|------|--------|--------|------|-------|---------|---------|-------|-----------|------------|---------|
|                        | 4    | 1      | 3      | 4.5  | 3     | 0       | 3       | 3.5   | 18529.210 | 0.005      | 1.0     |
|                        | 4    | 1      | 3      | 3.5  | 3     | 0       | 3       | 2.5   | 18529.080 | 0.011      | 1.0     |
|                        | 5    | 1      | 4      | 5.5  | 4     | 0       | 4       | 4.5   | 18529.351 | 0.008      | 1.0     |
|                        | 5    | 1      | 4      | 4.5  | 4     | 0       | 4       | 3.5   | 18529.210 | -0.010     | 0.1     |
| $K_a' - K_a'' = 2 - 1$ |      |        |        |      |       |         |         |       |           |            |         |
| P                      | 2    | 2      | 1      | 2.5  | 3     | 1       | 3       | 3.5   | 18540.727 | 0.001      | 1.0     |
|                        | 2    | 2      | 0      | 2.5  | 3     | 1       | 2       | 3.5   | 18540.470 | 0.007      | 1.0     |
|                        | 2    | 2      | 0      | 1.5  | 3     | 1       | 2       | 2.5   | 18539.233 | 0.003      | 1.0     |
| Q                      | 2    | 2      | 0      | 2.5  | 2     | 1       | 2       | 2.5   | 18544.641 | 0.003      | 1.0     |
|                        | 2    | 2      | 0      | 1.5  | 2     | 1       | 2       | 1.5   | 18543.387 | -0.001     | 1.0     |
|                        | 2    | 2      | 1      | 2.5  | 2     | 1       | 1       | 2.5   | 18544.512 | 0.004      | 1.0     |
|                        | 2    | 2      | 1      | 1.5  | 2     | 1       | 1       | 1.5   | 18543.242 | 0.001      | 1.0     |
|                        | 3    | 2      | 1      | 3.5  | 3     | 1       | 3       | 3.5   | 18543.813 | -0.004     | 1.0     |
|                        | 3    | 2      | 1      | 2.5  | 3     | 1       | 3       | 2.5   | 18543.088 | -0.001     | 1.0     |
|                        | 4    | 2      | 2      | 4.5  | 4     | 1       | 4       | 4.5   | 18542.808 | -0.010     | 1.0     |
|                        | 4    | 2      | 2      | 3.5  | 4     | 1       | 4       | 3.5   | 18542.272 | -0.005     | 1.0     |
|                        | 4    | 2      | 3      | 4.5  | 4     | 1       | 3       | 4.5   | 18542.363 | -0.011     | 1.0     |
|                        | 4    | 2      | 3      | 3.5  | 4     | 1       | 3       | 3.5   | 18541.805 | 0.004      | 1.0     |
|                        | 5    | 2      | 3      | 5.5  | 5     | 1       | 5       | 5.5   | 18541.602 | -0.009     | 1.0     |
|                        | 5    | 2      | 3      | 4.5  | 5     | 1       | 5       | 4.5   | 18541.176 | -0.001     | 1.0     |
|                        | 5    | 2      | 4      | 5.5  | 5     | 1       | 4       | 5.5   | 18540.937 | -0.003     | 1.0     |
| R                      | 2    | 2      | 1      | 2.5  | 1     | 1       | 1       | 1.5   | 18547.270 | 0.007      | 1.0     |
|                        | 2    | 2      | 1      | 1.5  | 1     | 1       | 1       | 0.5   | 18545.911 | -0.001     | 1.0     |
|                        | 2    | 2      | 0      | 2.5  | 1     | 1       | 0       | 1.5   | 18547.228 | 0.007      | 1.0     |
|                        | 2    | 2      | 0      | 1.5  | 1     | 1       | 0       | 0.5   | 18545.856 | -0.003     | 1.0     |
|                        | 3    | 2      | 2      | 2.5  | 2     | 1       | 2       | 1.5   | 18546.960 | 0.002      | 1.0     |
|                        | 3    | 2      | 1      | 3.5  | 2     | 1       | 1       | 2.5   | 18547.598 | -0.000     | 1.0     |
|                        | 3    | 2      | 1      | 2.5  | 2     | 1       | 1       | 1.5   | 18546.809 | -0.002     | 1.0     |
|                        | 4    | 2      | 3      | 4.5  | 3     | 1       | 3       | 3.5   | 18548.018 | -0.003     | 1.0     |
|                        | 4    | 2      | 3      | 3.5  | 3     | 1       | 3       | 2.5   | 18547.464 | 0.006      | 1.0     |
|                        | 4    | 2      | 2      | 4.5  | 3     | 1       | 2       | 3.5   | 18547.754 | -0.005     | 1.0     |
|                        | 4    | 2      | 2      | 3.5  | 3     | 1       | 2       | 2.5   | 18547.175 | 0.003      | 1.0     |

**Table A1**

**Continued**

|                                   | $N'$ | $K_a'$ | $K_c'$ | $J'$ | $N''$ | $K_a''$ | $K_c''$ | $J''$ | Obs.      | Obs.-Calc. | Weight. |
|-----------------------------------|------|--------|--------|------|-------|---------|---------|-------|-----------|------------|---------|
|                                   | 5    | 2      | 4      | 5.5  | 4     | 1       | 4       | 4.5   | 18548.109 | 0.002      | 1.0     |
|                                   | 5    | 2      | 3      | 5.5  | 4     | 1       | 3       | 4.5   | 18547.663 | -0.006     | 1.0     |
| $\tilde{A}(007) - \tilde{X}(000)$ |      |        |        |      |       |         |         |       |           |            |         |
| $K_a' - K_a'' = 0-1$              |      |        |        |      |       |         |         |       |           |            |         |
| P                                 | 0    | 0      | 0      | 0.5  | 1     | 1       | 0       | 1.5   | 19169.670 | -0.005     | 1.0     |
|                                   | 0    | 0      | 0      | 0.5  | 1     | 1       | 0       | 0.5   | 19169.401 | 0.004      | 1.0     |
|                                   | 1    | 0      | 1      | 1.5  | 2     | 1       | 1       | 2.5   | 19168.011 | -0.006     | 1.0     |
|                                   | 1    | 0      | 1      | 0.5  | 2     | 1       | 1       | 1.5   | 19167.833 | -0.007     | 1.0     |
|                                   | 2    | 0      | 2      | 2.5  | 3     | 1       | 2       | 3.5   | 19166.087 | 0.001      | 1.0     |
|                                   | 2    | 0      | 2      | 1.5  | 3     | 1       | 2       | 2.5   | 19165.946 | -0.001     | 1.0     |
|                                   | 3    | 0      | 3      | 3.5  | 4     | 1       | 3       | 4.5   | 19163.876 | 0.002      | 1.0     |
|                                   | 3    | 0      | 3      | 2.5  | 4     | 1       | 3       | 3.5   | 19163.751 | -0.002     | 1.0     |
| Q                                 | 1    | 0      | 1      | 1.5  | 1     | 1       | 1       | 1.5   | 19170.771 | -0.002     | 1.0     |
|                                   | 1    | 0      | 1      | 0.5  | 1     | 1       | 1       | 0.5   | 19170.508 | -0.003     | 1.0     |
|                                   | 2    | 0      | 2      | 2.5  | 2     | 1       | 2       | 2.5   | 19170.264 | 0.003      | 1.0     |
|                                   | 2    | 0      | 2      | 1.5  | 2     | 1       | 2       | 1.5   | 19170.104 | -0.001     | 1.0     |
|                                   | 3    | 0      | 3      | 3.5  | 3     | 1       | 3       | 3.5   | 19169.519 | -0.001     | 1.0     |
| R                                 | 2    | 0      | 2      | 2.5  | 1     | 1       | 0       | 1.5   | 19172.848 | 0.003      | 1.0     |
|                                   | 2    | 0      | 2      | 1.5  | 1     | 1       | 0       | 0.5   | 19172.578 | 0.002      | 1.0     |
|                                   | 3    | 0      | 3      | 3.5  | 2     | 1       | 1       | 2.5   | 19173.299 | -0.003     | 1.0     |
|                                   | 3    | 0      | 3      | 2.5  | 2     | 1       | 1       | 1.5   | 19173.134 | 0.002      | 1.0     |
|                                   | 4    | 0      | 4      | 4.5  | 3     | 1       | 2       | 3.5   | 19173.485 | -0.001     | 1.0     |
|                                   | 4    | 0      | 4      | 3.5  | 3     | 1       | 2       | 2.5   | 19173.354 | 0.001      | 1.0     |
| $K_a' - K_a'' = 1-0$              |      |        |        |      |       |         |         |       |           |            |         |
| P                                 | 1    | 1      | 0      | 1.5  | 2     | 0       | 2       | 2.5   | 19186.890 | -0.001     | 1.0     |
|                                   | 1    | 1      | 0      | 0.5  | 2     | 0       | 2       | 1.5   | 19186.350 | -0.005     | 1.0     |
|                                   | 2    | 1      | 1      | 2.5  | 3     | 0       | 3       | 3.5   | 19185.033 | -0.005     | 1.0     |
|                                   | 2    | 1      | 1      | 1.5  | 3     | 0       | 3       | 2.5   | 19184.793 | -0.002     | 1.0     |
| Q                                 | 1    | 1      | 1      | 1.5  | 1     | 0       | 1       | 1.5   | 19189.486 | -0.003     | 1.0     |
|                                   | 1    | 1      | 1      | 0.5  | 1     | 0       | 1       | 0.5   | 19188.970 | -0.001     | 1.0     |

**Table A1**

**Continued**

|   | $N'$ | $K_a'$ | $K_c'$ | $J'$ | $N''$ | $K_a''$ | $K_c''$ | $J''$ | Obs.                 | Obs.-Calc. | Weight. |
|---|------|--------|--------|------|-------|---------|---------|-------|----------------------|------------|---------|
|   | 2    | 1      | 2      | 2.5  | 2     | 0       | 2       | 2.5   | 19188.874            | 0.002      | 1.0     |
|   | 2    | 1      | 2      | 1.5  | 2     | 0       | 2       | 1.5   | 19188.660            | 0.001      | 1.0     |
|   | 3    | 1      | 3      | 3.5  | 3     | 0       | 3       | 3.5   | 19188.002            | 0.005      | 1.0     |
|   | 3    | 1      | 3      | 2.5  | 3     | 0       | 3       | 2.5   | 19187.852            | -0.000     | 1.0     |
|   | 4    | 1      | 4      | 4.5  | 4     | 0       | 4       | 4.5   | 19186.845            | 0.000      | 1.0     |
|   | 4    | 1      | 4      | 3.5  | 4     | 0       | 4       | 3.5   | 19186.739            | 0.003      | 1.0     |
| R | 1    | 1      | 0      | 1.5  | 0     | 0       | 0       | 0.5   | 19190.852            | 0.002      | 1.0     |
|   | 1    | 1      | 0      | 0.5  | 0     | 0       | 0       | 0.5   | 19190.335            | 0.004      | 1.0     |
|   | 2    | 1      | 1      | 2.5  | 1     | 0       | 1       | 1.5   | 19191.641            | 0.000      | 1.0     |
|   | 2    | 1      | 1      | 1.5  | 1     | 0       | 1       | 0.5   | 19191.415            | 0.003      | 1.0     |
|   | 3    | 1      | 2      | 3.5  | 2     | 0       | 2       | 2.5   | 19192.220            | 0.008      | 1.0     |
|   | 3    | 1      | 2      | 2.5  | 2     | 0       | 2       | 1.5   | 19192.047            | 0.003      | 1.0     |
|   | 4    | 1      | 3      | 4.5  | 3     | 0       | 3       | 3.5   | 19192.550            | 0.002      | 1.0     |
|   | 4    | 1      | 3      | 3.5  | 3     | 0       | 3       | 2.5   | 19192.412            | 0.006      | 1.0     |
|   | 5    | 1      | 4      | 5.5  | 4     | 0       | 4       | 4.5   | 19192.644            | -0.001     | 1.0     |
|   | 5    | 1      | 4      | 4.5  | 4     | 0       | 4       | 3.5   | 19192.513            | -0.004     | 1.0     |
|   |      |        |        |      |       |         |         |       | $K_a' - K_a'' = 2-1$ |            |         |
| Q | 2    | 2      | 0      | 2.5  | 2     | 1       | 2       | 2.5   | 19208.183            | 0.009      | 1.0     |
|   | 2    | 2      | 0      | 1.5  | 2     | 1       | 2       | 1.5   | 19206.876            | 0.003      | 1.0     |
|   | 2    | 2      | 1      | 2.5  | 2     | 1       | 1       | 2.5   | 19208.043            | -0.001     | 1.0     |
|   | 2    | 2      | 1      | 1.5  | 2     | 1       | 1       | 1.5   | 19206.727            | 0.001      | 1.0     |
|   | 3    | 2      | 1      | 3.5  | 3     | 1       | 3       | 3.5   | 19207.325            | 0.002      | 1.0     |
|   | 3    | 2      | 1      | 2.5  | 3     | 1       | 3       | 2.5   | 19206.578            | -0.001     | 1.0     |
|   | 3    | 2      | 2      | 3.5  | 3     | 1       | 2       | 3.5   | 19207.059            | -0.000     | 1.0     |
|   | 3    | 2      | 2      | 2.5  | 3     | 1       | 2       | 2.5   | 19206.284            | -0.006     | 1.0     |
|   | 4    | 2      | 2      | 4.5  | 4     | 1       | 4       | 4.5   | 19206.284            | -0.004     | 1.0     |
|   | 4    | 2      | 2      | 3.5  | 4     | 1       | 4       | 3.5   | 19205.738            | 0.003      | 1.0     |
|   | 4    | 2      | 3      | 4.5  | 4     | 1       | 3       | 4.5   | 19205.841            | -0.003     | 1.0     |
|   | 4    | 2      | 3      | 3.5  | 4     | 1       | 3       | 3.5   | 19205.257            | -0.002     | 1.0     |
| R | 2    | 2      | 1      | 2.5  | 1     | 1       | 1       | 1.5   | 19210.802            | 0.001      | 1.0     |
|   | 2    | 2      | 1      | 1.5  | 1     | 1       | 1       | 0.5   | 19209.393            | -0.003     | 1.0     |

**Table A1**

**Continued**

| $N'$ | $K_a'$ | $K_c'$ | $J'$ | $N''$ | $K_a''$ | $K_c''$ | $J''$ | Obs.      | Obs.-Calc. | Weight. |
|------|--------|--------|------|-------|---------|---------|-------|-----------|------------|---------|
| 2    | 2      | 0      | 2.5  | 1     | 1       | 0       | 1.5   | 19210.760 | 0.002      | 1.0     |
| 2    | 2      | 0      | 1.5  | 1     | 1       | 0       | 0.5   | 19209.345 | 0.001      | 1.0     |
| 3    | 2      | 2      | 3.5  | 2     | 1       | 2       | 2.5   | 19211.228 | -0.006     | 1.0     |
| 3    | 2      | 2      | 2.5  | 2     | 1       | 2       | 1.5   | 19210.450 | 0.002      | 1.0     |
| 3    | 2      | 1      | 3.5  | 2     | 1       | 1       | 2.5   | 19211.105 | 0.001      | 1.0     |
| 3    | 2      | 1      | 2.5  | 2     | 1       | 1       | 1.5   | 19210.305 | 0.004      | 1.0     |
| 4    | 2      | 3      | 4.5  | 3     | 1       | 3       | 3.5   | 19211.488 | -0.003     | 1.0     |
| 4    | 2      | 3      | 3.5  | 3     | 1       | 3       | 2.5   | 19210.912 | -0.004     | 1.0     |
| 4    | 2      | 2      | 4.5  | 3     | 1       | 2       | 3.5   | 19211.228 | -0.001     | 1.0     |
| 4    | 2      | 2      | 3.5  | 3     | 1       | 2       | 2.5   | 19210.629 | -0.001     | 1.0     |

$\tilde{A}(008) - \tilde{X}(000)$

$K_a' - K_a'' = 0-1$

|   |   |   |   |     |   |   |   |     |           |        |     |
|---|---|---|---|-----|---|---|---|-----|-----------|--------|-----|
| P | 0 | 0 | 0 | 0.5 | 1 | 1 | 0 | 1.5 | 19825.575 | -0.001 | 1.0 |
|   | 0 | 0 | 0 | 0.5 | 1 | 1 | 0 | 0.5 | 19825.306 | 0.007  | 1.0 |
|   | 1 | 0 | 1 | 1.5 | 2 | 1 | 1 | 2.5 | 19823.902 | -0.006 | 1.0 |
|   | 1 | 0 | 1 | 0.5 | 2 | 1 | 1 | 1.5 | 19823.735 | 0.003  | 1.0 |
|   | 2 | 0 | 2 | 2.5 | 3 | 1 | 2 | 3.5 | 19821.950 | -0.007 | 1.0 |
|   | 2 | 0 | 2 | 1.5 | 3 | 1 | 2 | 2.5 | 19821.815 | -0.004 | 1.0 |
|   | 3 | 0 | 3 | 3.5 | 4 | 1 | 3 | 4.5 | 19819.717 | 0.002  | 1.0 |
|   | 3 | 0 | 3 | 2.5 | 4 | 1 | 3 | 3.5 | 19819.596 | 0.001  | 1.0 |
| Q | 1 | 0 | 1 | 1.5 | 1 | 1 | 1 | 1.5 | 19826.666 | 0.002  | 1.0 |
|   | 1 | 0 | 1 | 0.5 | 1 | 1 | 1 | 0.5 | 19826.404 | 0.001  | 1.0 |
|   | 2 | 0 | 2 | 2.5 | 2 | 1 | 2 | 2.5 | 19826.131 | -0.001 | 1.0 |
|   | 2 | 0 | 2 | 1.5 | 2 | 1 | 2 | 1.5 | 19825.968 | -0.009 | 1.0 |
|   | 3 | 0 | 3 | 3.5 | 3 | 1 | 3 | 3.5 | 19825.361 | -0.001 | 1.0 |
|   | 3 | 0 | 3 | 2.5 | 3 | 1 | 3 | 2.5 | 19825.254 | 0.002  | 1.0 |
|   | 4 | 0 | 4 | 4.5 | 4 | 1 | 4 | 4.5 | 19824.346 | 0.001  | 1.0 |
|   | 4 | 0 | 4 | 3.5 | 4 | 1 | 4 | 3.5 | 19824.268 | 0.007  | 1.0 |
|   | 5 | 0 | 5 | 5.5 | 5 | 1 | 5 | 5.5 | 19823.085 | 0.005  | 1.0 |
|   | 5 | 0 | 5 | 4.5 | 5 | 1 | 5 | 4.5 | 19823.017 | 0.005  | 1.0 |

**Table A1**

**Continued**

|                        | $N'$ | $K_a'$ | $K_c'$ | $J'$ | $N''$ | $K_a''$ | $K_c''$ | $J''$ | Obs.      | Obs.-Calc. | Weight. |
|------------------------|------|--------|--------|------|-------|---------|---------|-------|-----------|------------|---------|
| R                      | 2    | 0      | 2      | 2.5  | 1     | 1       | 0       | 1.5   | 19828.707 | -0.009     | 1.0     |
|                        | 3    | 0      | 3      | 2.5  | 2     | 1       | 1       | 1.5   | 19828.976 | 0.001      | 1.0     |
|                        | 4    | 0      | 4      | 4.5  | 3     | 1       | 2       | 3.5   | 19829.291 | 0.004      | 1.0     |
|                        | 4    | 0      | 4      | 3.5  | 3     | 1       | 2       | 2.5   | 19829.163 | 0.007      | 1.0     |
| $K_a' - K_a'' = 1 - 0$ |      |        |        |      |       |         |         |       |           |            |         |
| P                      | 1    | 1      | 0      | 1.5  | 2     | 0       | 2       | 2.5   | 19842.817 | 0.002      | 1.0     |
|                        | 2    | 1      | 1      | 2.5  | 3     | 0       | 3       | 3.5   | 19840.939 | -0.000     | 1.0     |
|                        | 2    | 1      | 1      | 1.5  | 3     | 0       | 3       | 2.5   | 19840.692 | -0.002     | 1.0     |
|                        | 3    | 1      | 2      | 3.5  | 4     | 0       | 4       | 4.5   | 19838.837 | 0.001      | 1.0     |
|                        | 3    | 1      | 2      | 2.5  | 4     | 0       | 4       | 3.5   | 19838.649 | -0.004     | 1.0     |
|                        | 4    | 1      | 3      | 4.5  | 5     | 0       | 5       | 5.5   | 19836.482 | -0.008     | 1.0     |
|                        | 4    | 1      | 3      | 3.5  | 5     | 0       | 5       | 4.5   | 19836.335 | 0.000      | 1.0     |
| Q                      | 1    | 1      | 1      | 1.5  | 1     | 0       | 1       | 1.5   | 19845.413 | -0.002     | 1.0     |
|                        | 1    | 1      | 1      | 0.5  | 1     | 0       | 1       | 0.5   | 19844.870 | 0.003      | 1.0     |
|                        | 2    | 1      | 2      | 2.5  | 2     | 0       | 2       | 2.5   | 19844.779 | 0.002      | 1.0     |
|                        | 2    | 1      | 2      | 1.5  | 2     | 0       | 2       | 1.5   | 19844.562 | 0.003      | 1.0     |
|                        | 3    | 1      | 3      | 3.5  | 3     | 0       | 3       | 3.5   | 19843.871 | -0.001     | 1.0     |
|                        | 3    | 1      | 3      | 2.5  | 3     | 0       | 3       | 2.5   | 19843.725 | 0.000      | 1.0     |
|                        | 4    | 1      | 4      | 4.5  | 4     | 0       | 4       | 4.5   | 19842.685 | 0.003      | 1.0     |
|                        | 4    | 1      | 4      | 3.5  | 4     | 0       | 4       | 3.5   | 19842.569 | -0.003     | 1.0     |
|                        | 5    | 1      | 5      | 5.5  | 5     | 0       | 5       | 5.5   | 19841.204 | 0.000      | 1.0     |
|                        | 5    | 1      | 5      | 4.5  | 5     | 0       | 5       | 4.5   | 19841.118 | 0.002      | 1.0     |
|                        | 6    | 1      | 6      | 6.5  | 6     | 0       | 6       | 6.5   | 19839.437 | 0.002      | 1.0     |
|                        | 6    | 1      | 6      | 5.5  | 6     | 0       | 6       | 5.5   | 19839.360 | -0.004     | 1.0     |
|                        | 7    | 1      | 7      | 7.5  | 7     | 0       | 7       | 7.5   | 19837.376 | 0.001      | 1.0     |
|                        | 7    | 1      | 7      | 6.5  | 7     | 0       | 7       | 6.5   | 19837.314 | -0.004     | 1.0     |
| R                      | 1    | 1      | 0      | 1.5  | 0     | 0       | 0       | 0.5   | 19846.782 | 0.009      | 1.0     |
|                        | 1    | 1      | 0      | 0.5  | 0     | 0       | 0       | 0.5   | 19846.217 | -0.011     | 1.0     |
|                        | 2    | 1      | 1      | 2.5  | 1     | 0       | 1       | 1.5   | 19847.543 | 0.001      | 1.0     |
|                        | 2    | 1      | 1      | 1.5  | 1     | 0       | 1       | 0.5   | 19847.305 | -0.005     | 1.0     |
|                        | 3    | 1      | 2      | 3.5  | 2     | 0       | 2       | 2.5   | 19848.086 | 0.003      | 1.0     |
|                        | 3    | 1      | 2      | 2.5  | 2     | 0       | 2       | 1.5   | 19847.913 | 0.000      | 1.0     |

**Table A1**

**Continued**

|   | $N'$                 | $K_a'$ | $K_c'$ | $J'$ | $N''$ | $K_a''$ | $K_c''$ | $J''$ | Obs.      | Obs.-Calc. | Weight. |
|---|----------------------|--------|--------|------|-------|---------|---------|-------|-----------|------------|---------|
|   | 4                    | 1      | 3      | 4.5  | 3     | 0       | 3       | 3.5   | 19848.375 | -0.002     | 1.0     |
|   | 4                    | 1      | 3      | 3.5  | 3     | 0       | 3       | 2.5   | 19848.232 | -0.003     | 1.0     |
|   | 5                    | 1      | 4      | 5.5  | 4     | 0       | 4       | 4.5   | 19848.425 | 0.003      | 1.0     |
|   | $K_a' - K_a'' = 2-1$ |        |        |      |       |         |         |       |           |            |         |
| Q | 2                    | 2      | 0      | 2.5  | 2     | 1       | 2       | 2.5   | 19864.182 | 0.007      | 1.0     |
|   | 2                    | 2      | 1      | 2.5  | 2     | 1       | 1       | 2.5   | 19864.056 | 0.010      | 1.0     |
|   | 4                    | 2      | 2      | 3.5  | 4     | 1       | 4       | 3.5   | 19861.653 | 0.001      | 0.1     |
|   | 4                    | 2      | 3      | 4.5  | 4     | 1       | 3       | 4.5   | 19861.772 | 0.001      | 0.1     |
| R | 2                    | 2      | 1      | 2.5  | 1     | 1       | 1       | 1.5   | 19866.797 | -0.005     | 1.0     |
|   | 2                    | 2      | 0      | 2.5  | 1     | 1       | 0       | 1.5   | 19866.762 | 0.002      | 1.0     |
|   | 2                    | 2      | 0      | 1.5  | 1     | 1       | 0       | 0.5   | 19865.291 | 0.005      | 1.0     |
|   | 3                    | 2      | 2      | 3.5  | 2     | 1       | 2       | 2.5   | 19867.197 | -0.005     | 1.0     |
|   | 3                    | 2      | 2      | 2.5  | 2     | 1       | 2       | 1.5   | 19866.406 | 0.003      | 1.0     |
|   | 3                    | 2      | 1      | 3.5  | 2     | 1       | 1       | 2.5   | 19867.072 | -0.000     | 1.0     |
|   | 3                    | 2      | 1      | 2.5  | 2     | 1       | 1       | 1.5   | 19866.260 | 0.004      | 1.0     |
|   | 4                    | 2      | 3      | 4.5  | 3     | 1       | 3       | 3.5   | 19867.405 | -0.013     | 1.0     |
|   | 4                    | 2      | 3      | 3.5  | 3     | 1       | 3       | 2.5   | 19866.831 | -0.003     | 1.0     |
